# Supplementary material
Source: PubMed Central journal article supplement (PMC6954164)
Supplement: 13205_2019_2027_MOESM2_ESM.pdf [file 13205_2019_2027_MOESM2_ESM.pdf]

## Supplementary Table S2: All samples bacterial genus abundance

| Genus                           | S1_reads | S1_ratio | S2_reads | S2_ratio | S3_reads | S3_ratio | S4_reads | S4_ratio | S5_reads | S5_ratio |
|---------------------------------|----------|----------|----------|----------|----------|----------|----------|----------|----------|----------|
| Thermoflavimicrobium            | 0        | 0        | 0        | 0        | 0        | 0        | 0        | 0        | 1        | 0        |
| Procabacter                     | 1        | 0        | 0        | 0        | 0        | 0        | 3        | 0.01     | 0        | 0        |
| Desulfosarcina                  | 2        | 0.01     | 1        | 0        | 0        | 0        | 0        | 0        | 0        | 0        |
| unclassified_Cytophagaceae      | 19       | 0.05     | 10       | 0.03     | 2        | 0.01     | 33       | 0.09     | 14       | 0.04     |
| Orientia                        | 0        | 0        | 1        | 0        | 0        | 0        | 0        | 0        | 1        | 0        |
| unclassified_Heliobacteriaceae  | 0        | 0        | 1        | 0        | 0        | 0        | 0        | 0        | 2        | 0.01     |
| Desulfopila                     | 1        | 0        | 0        | 0        | 0        | 0        | 0        | 0        | 0        | 0        |
| Chloroflexus                    | 1        | 0        | 0        | 0        | 0        | 0        | 0        | 0        | 0        | 0        |
| Reyranela                       | 30       | 0.08     | 22       | 0.06     | 17       | 0.05     | 90       | 0.24     | 36       | 0.1      |
| Denitrisoma                     | 15       | 0.04     | 16       | 0.04     | 1        | 0        | 8        | 0.02     | 1        | 0        |
| Candidatus_Allobeggiatoa        | 1        | 0        | 4        | 0.01     | 0        | 0        | 0        | 0        | 0        | 0        |
| Anaerolinea                     | 9        | 0.02     | 21       | 0.06     | 0        | 0        | 71       | 0.19     | 7        | 0.02     |
| Methylovirgula                  | 3        | 0.01     | 9        | 0.02     | 0        | 0        | 1        | 0        | 0        | 0        |
| Brevundimonas                   | 1        | 0        | 16       | 0.04     | 3        | 0.01     | 10       | 0.03     | 1        | 0        |
| unclassified_Spirochaetaceae    | 10       | 0.03     | 8        | 0.02     | 3        | 0.01     | 14       | 0.04     | 12       | 0.03     |
| Pedomicrobium                   | 20       | 0.05     | 119      | 0.32     | 26       | 0.07     | 107      | 0.29     | 102      | 0.28     |
| Demequina                       | 0        | 0        | 0        | 0        | 0        | 0        | 1        | 0        | 1        | 0        |
| unclassified_Desulfohalobiaceae | 6        | 0.02     | 1        | 0        | 1        | 0        | 3        | 0.01     | 6        | 0.02     |
| Haliea                          | 8        | 0.02     | 2        | 0.01     | 4        | 0.01     | 18       | 0.05     | 6        | 0.02     |
| Pilimelia                       | 0        | 0        | 0        | 0        | 1        | 0        | 1        | 0        | 1        | 0        |
| Desulfofrigus                   | 11       | 0.03     | 8        | 0.02     | 1        | 0        | 5        | 0.01     | 13       | 0.04     |
| C1-B045                         | 4        | 0.01     | 3        | 0.01     | 0        | 0        | 1        | 0        | 4        | 0.01     |
| Sideroxydans                    | 2        | 0.01     | 4        | 0.01     | 0        | 0        | 0        | 0        | 0        | 0        |
| Kineococcus                     | 1        | 0        | 3        | 0.01     | 0        | 0        | 0        | 0        | 0        | 0        |
| Rhodobium                       | 13       | 0.04     | 11       | 0.03     | 14       | 0.04     | 140      | 0.38     | 130      | 0.35     |
| Candidatus_Captivus             | 4        | 0.01     | 1        | 0        | 1        | 0        | 0        | 0        | 1        | 0        |
| Pirellula                       | 16       | 0.04     | 23       | 0.06     | 5        | 0.01     | 76       | 0.21     | 13       | 0.04     |
| Pedosphaera                     | 6        | 0.02     | 4        | 0.01     | 10       | 0.03     | 106      | 0.29     | 34       | 0.09     |
| RC9_gut_group                   | 7        | 0.02     | 1        | 0        | 0        | 0        | 0        | 0        | 0        | 0        |
| Zavarzinella                    | 1        | 0        | 0        | 0        | 0        | 0        | 0        | 0        | 0        | 0        |
| Candidatus_Cloacamonas          | 1        | 0        | 0        | 0        | 0        | 0        | 0        | 0        | 0        | 0        |
| Ralstonia                       | 10       | 0.03     | 17       | 0.05     | 1        | 0        | 1        | 0        | 1        | 0        |
| CL500-3                         | 22       | 0.06     | 17       | 0.05     | 0        | 0        | 8        | 0.02     | 5        | 0.01     |
| Marmoricola                     | 4        | 0.01     | 1        | 0        | 3        | 0.01     | 61       | 0.17     | 29       | 0.08     |
| Iamia                           | 16       | 0.04     | 19       | 0.05     | 29       | 0.08     | 97       | 0.26     | 154      | 0.42     |
| Epulopiscium                    | 1        | 0        | 2        | 0.01     | 0        | 0        | 0        | 0        | 0        | 0        |
| Candidatus_Microthrix           | 15       | 0.04     | 14       | 0.04     | 18       | 0.05     | 74       | 0.2      | 122      | 0.33     |
| Rhodoplanes                     | 4        | 0.01     | 3        | 0.01     | 1        | 0        | 13       | 0.04     | 9        | 0.02     |
| Marinobacterium                 | 5        | 0.01     | 2        | 0.01     | 0        | 0        | 0        | 0        | 1        | 0        |
| Methylodaldum                   | 1        | 0        | 1        | 0        | 0        | 0        | 0        | 0        | 0        | 0        |
| Ilumatobacter                   | 5        | 0.01     | 5        | 0.01     | 11       | 0.03     | 39       | 0.11     | 109      | 0.3      |
| Tepidicella                     | 0        | 0        | 0        | 0        | 0        | 0        | 4        | 0.01     | 0        | 0        |
| Calothrix                       | 0        | 0        | 1        | 0        | 0        | 0        | 0        | 0        | 0        | 0        |
| Puniceicoccus                   | 0        | 0        | 1        | 0        | 0        | 0        | 0        | 0        | 0        | 0        |
| Kribbella                       | 3        | 0.01     | 5        | 0.01     | 0        | 0        | 1        | 0        | 0        | 0        |
| Acidiphilium                    | 1        | 0        | 0        | 0        | 0        | 0        | 0        | 0        | 0        | 0        |
| Sphingobium                     | 264      | 0.72     | 223      | 0.61     | 498      | 1.35     | 1387     | 3.77     | 188      | 0.51     |
| Lysobacter                      | 10       | 0.03     | 21       | 0.06     | 1100     | 2.99     | 163      | 0.44     | 18       | 0.05     |
| Aciditerrimonas                 | 55       | 0.15     | 45       | 0.12     | 16       | 0.04     | 23       | 0.06     | 54       | 0.15     |
| Luteolibacter                   | 2        | 0.01     | 1        | 0        | 0        | 0        | 2        | 0.01     | 3        | 0.01     |
| Chitinibacter                   | 7        | 0.02     | 2        | 0.01     | 0        | 0        | 0        | 0        | 3        | 0.01     |
| Candidatus_Lariskella           | 4        | 0.01     | 2        | 0.01     | 0        | 0        | 0        | 0        | 0        | 0        |
| Clostridium_sensu_stricto_2     | 0        | 0        | 1        | 0        | 0        | 0        | 0        | 0        | 1        | 0        |
| unclassified_Erythrobacteraceae | 3        | 0.01     | 5        | 0.01     | 0        | 0        | 21       | 0.06     | 0        | 0        |
| AUTHM297                        | 3        | 0.01     | 1        | 0        | 0        | 0        | 0        | 0        | 0        | 0        |
| Pseudoduganella                 | 0        | 0        | 1        | 0        | 0        | 0        | 0        | 0        | 0        | 0        |
| unclassified_Nitrosomonadaceae  | 45       | 0.12     | 957      | 2.6      | 54       | 0.15     | 166      | 0.45     | 100      | 0.27     |
| Lautropia                       | 1        | 0        | 0        | 0        | 0        | 0        | 0        | 0        | 0        | 0        |
| Buttiaxella                     | 0        | 0        | 0        | 0        | 1        | 0        | 0        | 0        | 0        | 0        |
| Lysinibacillus                  | 4        | 0.01     | 5        | 0.01     | 1        | 0        | 0        | 0        | 7        | 0.02     |
| unclassified_Solimonadaceae     | 69       | 0.19     | 15       | 0.04     | 0        | 0        | 5        | 0.01     | 0        | 0        |
| Coraliomargarita                | 1        | 0        | 3        | 0.01     | 0        | 0        | 1        | 0        | 0        | 0        |
| Labrys                          | 21       | 0.06     | 25       | 0.07     | 2        | 0.01     | 7        | 0.02     | 7        | 0.02     |
| Xenophilus                      | 11       | 0.03     | 11       | 0.03     | 3        | 0.01     | 37       | 0.1      | 0        | 0        |
| GAL15                           | 54       | 0.15     | 36       | 0.1      | 9        | 0.02     | 22       | 0.06     | 22       | 0.06     |
| Hellea                          | 0        | 0        | 4        | 0.01     | 0        | 0        | 0        | 0        | 0        | 0        |
| Fluviicola                      | 22       | 0.06     | 6        | 0.02     | 0        | 0        | 2        | 0.01     | 0        | 0        |

|                                  |      |      |      |      |     |      |     |      |      |      |
|----------------------------------|------|------|------|------|-----|------|-----|------|------|------|
| Candidatus_Nitrososphaera        | 1    | 0    | 0    | 0    | 0   | 0    | 0   | 0    | 0    | 0    |
| Actinomadura                     | 0    | 0    | 0    | 0    | 1   | 0    | 1   | 0    | 2    | 0.01 |
| Adhaeribacter                    | 11   | 0.03 | 435  | 1.18 | 0   | 0    | 1   | 0    | 4    | 0.01 |
| Roseiflexus                      | 54   | 0.15 | 166  | 0.45 | 4   | 0.01 | 37  | 0.1  | 14   | 0.04 |
| Desulfarculus                    | 3    | 0.01 | 0    | 0    | 0   | 0    | 0   | 0    | 0    | 0    |
| Pseudogulbenkiana                | 26   | 0.07 | 24   | 0.07 | 6   | 0.02 | 11  | 0.03 | 0    | 0    |
| Parvibaculum                     | 1    | 0    | 2    | 0.01 | 0   | 0    | 0   | 0    | 0    | 0    |
| Pasteuria                        | 0    | 0    | 0    | 0    | 0   | 0    | 0   | 0    | 1    | 0    |
| Ignavibacterium                  | 40   | 0.11 | 20   | 0.05 | 1   | 0    | 2   | 0.01 | 0    | 0    |
| unclassified_Rickettsiaceae      | 4    | 0.01 | 2    | 0.01 | 1   | 0    | 2   | 0.01 | 2    | 0.01 |
| Caulobacter                      | 15   | 0.04 | 16   | 0.04 | 501 | 1.36 | 101 | 0.27 | 2    | 0.01 |
| Pseudonocardia                   | 50   | 0.14 | 65   | 0.18 | 5   | 0.01 | 20  | 0.05 | 43   | 0.12 |
| Roseimicrobium                   | 0    | 0    | 3    | 0.01 | 0   | 0    | 2   | 0.01 | 0    | 0    |
| Gaiella                          | 1263 | 3.43 | 1013 | 2.75 | 214 | 0.58 | 412 | 1.12 | 1472 | 4    |
| Anaerospira                      | 0    | 0    | 1    | 0    | 0   | 0    | 0   | 0    | 0    | 0    |
| Thiohalophilus                   | 2    | 0.01 | 3    | 0.01 | 0   | 0    | 0   | 0    | 0    | 0    |
| Thiobacillus                     | 3    | 0.01 | 0    | 0    | 1   | 0    | 0   | 0    | 0    | 0    |
| Tahibacter                       | 9    | 0.02 | 2    | 0.01 | 0   | 0    | 0   | 0    | 0    | 0    |
| Sufflavibacter                   | 1    | 0    | 1    | 0    | 0   | 0    | 0   | 0    | 0    | 0    |
| Terriglobus                      | 0    | 0    | 0    | 0    | 57  | 0.15 | 0   | 0    | 0    | 0    |
| Ramlibacter                      | 52   | 0.14 | 144  | 0.39 | 1   | 0    | 205 | 0.56 | 2    | 0.01 |
| unclassified_Syntrophomonadaceae | 1    | 0    | 0    | 0    | 0   | 0    | 0   | 0    | 0    | 0    |
| Methylophilus                    | 1    | 0    | 0    | 0    | 0   | 0    | 0   | 0    | 0    | 0    |
| Candidatus_Contubernalis         | 0    | 0    | 0    | 0    | 0   | 0    | 0   | 0    | 1    | 0    |
| Chryseobacterium                 | 1    | 0    | 0    | 0    | 0   | 0    | 3   | 0.01 | 0    | 0    |
| Candidatus_Solibacter            | 138  | 0.37 | 369  | 1    | 6   | 0.02 | 154 | 0.42 | 25   | 0.07 |
| Ammoniphilus                     | 1    | 0    | 0    | 0    | 0   | 0    | 0   | 0    | 0    | 0    |
| unclassified_Moraxellaceae       | 59   | 0.16 | 102  | 0.28 | 5   | 0.01 | 96  | 0.26 | 4    | 0.01 |
| Desulfurobacterium               | 20   | 0.05 | 9    | 0.02 | 1   | 0    | 3   | 0.01 | 1    | 0    |
| W4                               | 24   | 0.07 | 8    | 0.02 | 0   | 0    | 11  | 0.03 | 5    | 0.01 |
| Rothia                           | 1    | 0    | 0    | 0    | 0   | 0    | 0   | 0    | 0    | 0    |
| Fervidobacterium                 | 1    | 0    | 2    | 0.01 | 0   | 0    | 0   | 0    | 0    | 0    |
| Acidovorax                       | 82   | 0.22 | 120  | 0.33 | 22  | 0.06 | 63  | 0.17 | 67   | 0.18 |
| Pleomorphomonas                  | 1    | 0    | 2    | 0.01 | 0   | 0    | 0   | 0    | 0    | 0    |
| unclassified_Prevotellaceae      | 0    | 0    | 0    | 0    | 0   | 0    | 0   | 0    | 1    | 0    |
| Nonomuraea                       | 0    | 0    | 2    | 0.01 | 1   | 0    | 0   | 0    | 3    | 0.01 |
| Sunxiuqinia                      | 0    | 0    | 1    | 0    | 1   | 0    | 3   | 0.01 | 0    | 0    |
| unclassified_Holosporaceae       | 12   | 0.03 | 19   | 0.05 | 4   | 0.01 | 4   | 0.01 | 3    | 0.01 |
| Tetrasphaera                     | 6    | 0.02 | 47   | 0.13 | 4   | 0.01 | 14  | 0.04 | 10   | 0.03 |
| Candidatus_Methylacidiphilum     | 10   | 0.03 | 10   | 0.03 | 0   | 0    | 3   | 0.01 | 1    | 0    |
| Turcibacter                      | 0    | 0    | 1    | 0    | 0   | 0    | 0   | 0    | 0    | 0    |
| Blastomonas                      | 23   | 0.06 | 49   | 0.13 | 8   | 0.02 | 25  | 0.07 | 18   | 0.05 |
| Myxococcus                       | 14   | 0.04 | 20   | 0.05 | 2   | 0.01 | 7   | 0.02 | 3    | 0.01 |
| Candidatus_Glomeribacter         | 1    | 0    | 1    | 0    | 0   | 0    | 0   | 0    | 0    | 0    |
| Thalassospira                    | 7    | 0.02 | 5    | 0.01 | 1   | 0    | 0   | 0    | 0    | 0    |
| Thauera                          | 10   | 0.03 | 12   | 0.03 | 1   | 0    | 22  | 0.06 | 1    | 0    |
| Litoricola                       | 0    | 0    | 0    | 0    | 1   | 0    | 0   | 0    | 0    | 0    |
| Candidatus_Metachlamydia         | 5    | 0.01 | 21   | 0.06 | 13  | 0.04 | 12  | 0.03 | 12   | 0.03 |
| Ammonifex                        | 1    | 0    | 1    | 0    | 1   | 0    | 0   | 0    | 0    | 0    |
| Waddlia                          | 3    | 0.01 | 6    | 0.02 | 0   | 0    | 0   | 0    | 0    | 0    |
| Actinoplanes                     | 10   | 0.03 | 14   | 0.04 | 1   | 0    | 9   | 0.02 | 2    | 0.01 |
| Rhodoblastus                     | 1    | 0    | 1    | 0    | 0   | 0    | 0   | 0    | 0    | 0    |
| unclassified_Pseudomonadaceae    | 0    | 0    | 0    | 0    | 1   | 0    | 0   | 0    | 0    | 0    |
| Sandaracinus                     | 25   | 0.07 | 59   | 0.16 | 5   | 0.01 | 26  | 0.07 | 12   | 0.03 |
| Herbaspirillum                   | 0    | 0    | 1    | 0    | 28  | 0.08 | 0   | 0    | 0    | 0    |
| Thermodesulfatator               | 1    | 0    | 2    | 0.01 | 0   | 0    | 0   | 0    | 0    | 0    |
| Desulfobacterium                 | 12   | 0.03 | 13   | 0.04 | 0   | 0    | 4   | 0.01 | 3    | 0.01 |
| Wohlfahrtiimonas                 | 0    | 0    | 1    | 0    | 0   | 0    | 0   | 0    | 0    | 0    |
| Nocardiopsis                     | 0    | 0    | 0    | 0    | 0   | 0    | 4   | 0.01 | 0    | 0    |
| unclassified_Neisseriaceae       | 1    | 0    | 7    | 0.02 | 0   | 0    | 1   | 0    | 0    | 0    |
| Candidatus_Scalindua             | 1    | 0    | 0    | 0    | 0   | 0    | 0   | 0    | 0    | 0    |
| Bacteriovorax                    | 1    | 0    | 0    | 0    | 0   | 0    | 1   | 0    | 0    | 0    |
| Desulfotomaculum                 | 11   | 0.03 | 5    | 0.01 | 1   | 0    | 1   | 0    | 1    | 0    |
| Moorella                         | 1    | 0    | 0    | 0    | 0   | 0    | 0   | 0    | 0    | 0    |
| Clostridium_sensu_stricto_13     | 1    | 0    | 7    | 0.02 | 2   | 0.01 | 74  | 0.2  | 5    | 0.01 |
| Phaselocystis                    | 75   | 0.2  | 195  | 0.53 | 10  | 0.03 | 28  | 0.08 | 27   | 0.07 |
| Luedemannella                    | 50   | 0.14 | 65   | 0.18 | 6   | 0.02 | 16  | 0.04 | 24   | 0.07 |
| Nitrospira                       | 25   | 0.07 | 287  | 0.78 | 10  | 0.03 | 93  | 0.25 | 69   | 0.19 |
| Stigmatella                      | 1    | 0    | 0    | 0    | 0   | 0    | 0   | 0    | 0    | 0    |
| Prolixibacter                    | 0    | 0    | 0    | 0    | 0   | 0    | 2   | 0.01 | 0    | 0    |
| Chroococciopsis                  | 1    | 0    | 2    | 0.01 | 1   | 0    | 3   | 0.01 | 4    | 0.01 |

|                                   |      |      |     |      |       |       |      |       |       |      |
|-----------------------------------|------|------|-----|------|-------|-------|------|-------|-------|------|
| Salinisphaera                     | 0    | 0    | 1   | 0    | 0     | 0     | 0    | 0     | 0     | 0    |
| Solimonas                         | 5    | 0.01 | 1   | 0    | 0     | 0     | 0    | 0     | 0     | 0    |
| unclassified_Ktedonobacteraceae   | 6    | 0.02 | 6   | 0.02 | 2     | 0.01  | 8    | 0.02  | 6     | 0.02 |
| Oceanobacillus                    | 1    | 0    | 0   | 0    | 0     | 0     | 3    | 0.01  | 1     | 0    |
| Clostridium_sensu_stricto_1       | 6    | 0.02 | 6   | 0.02 | 3     | 0.01  | 5    | 0.01  | 8     | 0.02 |
| Haloactinopolyspora               | 1    | 0    | 0   | 0    | 0     | 0     | 0    | 0     | 0     | 0    |
| Viridibacillus                    | 1    | 0    | 0   | 0    | 0     | 0     | 0    | 0     | 0     | 0    |
| Shinella                          | 0    | 0    | 3   | 0.01 | 0     | 0     | 2    | 0.01  | 5     | 0.01 |
| Dongia                            | 6    | 0.02 | 2   | 0.01 | 12    | 0.03  | 2    | 0.01  | 10    | 0.03 |
| Propionicicella                   | 0    | 0    | 0   | 0    | 0     | 0     | 5    | 0.01  | 0     | 0    |
| Candidatus_Amphibiichlamydia      | 0    | 0    | 1   | 0    | 0     | 0     | 0    | 0     | 0     | 0    |
| Escherichia-Shigella              | 1471 | 4    | 873 | 2.37 | 70    | 0.19  | 618  | 1.68  | 274   | 0.74 |
| Asahi_BRW2                        | 1    | 0    | 0   | 0    | 0     | 0     | 0    | 0     | 0     | 0    |
| Xylophilus                        | 0    | 0    | 0   | 0    | 0     | 0     | 20   | 0.05  | 0     | 0    |
| Planctomyces                      | 82   | 0.22 | 134 | 0.36 | 1     | 0     | 38   | 0.1   | 16    | 0.04 |
| unclassified_Puniceicoccaceae     | 5    | 0.01 | 0   | 0    | 0     | 0     | 0    | 0     | 0     | 0    |
| unclassified_Flammeovirgaceae     | 1    | 0    | 0   | 0    | 0     | 0     | 0    | 0     | 0     | 0    |
| Geothrix                          | 3    | 0.01 | 3   | 0.01 | 0     | 0     | 88   | 0.24  | 0     | 0    |
| Cellulomonas                      | 18   | 0.05 | 31  | 0.08 | 10    | 0.03  | 34   | 0.09  | 28    | 0.08 |
| unclassified_Salinisphaeraceae    | 4    | 0.01 | 0   | 0    | 0     | 0     | 1    | 0     | 0     | 0    |
| Pectobacterium                    | 0    | 0    | 3   | 0.01 | 1     | 0     | 0    | 0     | 5     | 0.01 |
| unclassified_Sneathiellaceae      | 3    | 0.01 | 4   | 0.01 | 1     | 0     | 1    | 0     | 0     | 0    |
| Ktedonobacter                     | 5    | 0.01 | 3   | 0.01 | 1     | 0     | 1    | 0     | 7     | 0.02 |
| Ethanoligenens                    | 1    | 0    | 0   | 0    | 0     | 0     | 0    | 0     | 0     | 0    |
| Azonexus                          | 0    | 0    | 1   | 0    | 0     | 0     | 0    | 0     | 0     | 0    |
| unclassified_Nannocystaceae       | 28   | 0.08 | 9   | 0.02 | 0     | 0     | 1    | 0     | 1     | 0    |
| Brasilonema                       | 1    | 0    | 1   | 0    | 1     | 0     | 0    | 0     | 0     | 0    |
| Legionella                        | 16   | 0.04 | 15  | 0.04 | 1     | 0     | 7    | 0.02  | 4     | 0.01 |
| Kineosporia                       | 26   | 0.07 | 25  | 0.07 | 1     | 0     | 10   | 0.03  | 4     | 0.01 |
| Incertae_Sedis                    | 33   | 0.09 | 12  | 0.03 | 9     | 0.02  | 27   | 0.07  | 25    | 0.07 |
| Pseudospirillum                   | 0    | 0    | 1   | 0    | 0     | 0     | 2    | 0.01  | 0     | 0    |
| unclassified_Rhodobacteraceae     | 12   | 0.03 | 13  | 0.04 | 0     | 0     | 5    | 0.01  | 3     | 0.01 |
| Candidatus_Chlorothrix            | 2    | 0.01 | 0   | 0    | 0     | 0     | 0    | 0     | 0     | 0    |
| Rheinheimera                      | 0    | 0    | 1   | 0    | 0     | 0     | 0    | 0     | 0     | 0    |
| Nordella                          | 45   | 0.12 | 48  | 0.13 | 4     | 0.01  | 19   | 0.05  | 25    | 0.07 |
| unclassified_Bacteriovoracaceae   | 27   | 0.07 | 22  | 0.06 | 3     | 0.01  | 14   | 0.04  | 8     | 0.02 |
| unclassified_Sphingobacteriaceae  | 1    | 0    | 0   | 0    | 0     | 0     | 0    | 0     | 0     | 0    |
| Xanthomonas                       | 2    | 0.01 | 29  | 0.08 | 3     | 0.01  | 15   | 0.04  | 2     | 0.01 |
| Hydrothalea                       | 0    | 0    | 1   | 0    | 0     | 0     | 0    | 0     | 0     | 0    |
| Zoogloea                          | 0    | 0    | 2   | 0.01 | 0     | 0     | 0    | 0     | 0     | 0    |
| SM1A02                            | 74   | 0.2  | 65  | 0.18 | 4     | 0.01  | 23   | 0.06  | 6     | 0.02 |
| Sorangium                         | 33   | 0.09 | 109 | 0.3  | 3     | 0.01  | 14   | 0.04  | 28    | 0.08 |
| Asanoa                            | 1    | 0    | 0   | 0    | 0     | 0     | 0    | 0     | 0     | 0    |
| Sphaerisporangium                 | 2    | 0.01 | 0   | 0    | 2     | 0.01  | 0    | 0     | 4     | 0.01 |
| Uliginosibacterium                | 4    | 0.01 | 0   | 0    | 0     | 0     | 2    | 0.01  | 0     | 0    |
| Pelagibius                        | 1    | 0    | 0   | 0    | 0     | 0     | 0    | 0     | 0     | 0    |
| unclassified_Rhodocyclaceae       | 55   | 0.15 | 68  | 0.18 | 0     | 0     | 49   | 0.13  | 4     | 0.01 |
| Roseomonas                        | 4    | 0.01 | 7   | 0.02 | 7     | 0.02  | 31   | 0.08  | 1     | 0    |
| 060F05-B-SD-P93                   | 0    | 0    | 1   | 0    | 0     | 0     | 0    | 0     | 0     | 0    |
| Blastopirellula                   | 0    | 0    | 12  | 0.03 | 0     | 0     | 1    | 0     | 3     | 0.01 |
| Leptolinea                        | 0    | 0    | 3   | 0.01 | 0     | 0     | 2    | 0.01  | 2     | 0.01 |
| Solibacillus                      | 0    | 0    | 1   | 0    | 0     | 0     | 0    | 0     | 2     | 0.01 |
| Magnetospira                      | 2    | 0.01 | 0   | 0    | 0     | 0     | 0    | 0     | 1     | 0    |
| PB79                              | 15   | 0.04 | 11  | 0.03 | 1     | 0     | 10   | 0.03  | 4     | 0.01 |
| Rhodoligotrophos                  | 12   | 0.03 | 12  | 0.03 | 1     | 0     | 3    | 0.01  | 8     | 0.02 |
| unclassified_Peptostreptococcacei | 1    | 0    | 0   | 0    | 0     | 0     | 0    | 0     | 1     | 0    |
| Spirilliplanes                    | 4    | 0.01 | 8   | 0.02 | 0     | 0     | 1    | 0     | 3     | 0.01 |
| Pseudomonas                       | 157  | 0.43 | 88  | 0.24 | 26780 | 72.73 | 8693 | 23.61 | 16089 | 43.7 |
| vadinBC27_wastewater-sludge_g     | 5    | 0.01 | 3   | 0.01 | 0     | 0     | 0    | 0     | 0     | 0    |
| Saccharopolyspora                 | 0    | 0    | 1   | 0    | 0     | 0     | 0    | 0     | 0     | 0    |
| Blastococcus                      | 10   | 0.03 | 63  | 0.17 | 0     | 0     | 6    | 0.02  | 4     | 0.01 |
| SEEP-SRB1                         | 1    | 0    | 6   | 0.02 | 0     | 0     | 0    | 0     | 2     | 0.01 |
| Candidatus_Desulforudis           | 3    | 0.01 | 1   | 0    | 0     | 0     | 1    | 0     | 1     | 0    |
| Patulibacter                      | 86   | 0.23 | 229 | 0.62 | 31    | 0.08  | 93   | 0.25  | 104   | 0.28 |
| Geobacillus                       | 11   | 0.03 | 17  | 0.05 | 2     | 0.01  | 8    | 0.02  | 2     | 0.01 |
| Longilinea                        | 0    | 0    | 3   | 0.01 | 0     | 0     | 0    | 0     | 0     | 0    |
| Candidatus_Koribacter             | 75   | 0.2  | 44  | 0.12 | 5     | 0.01  | 25   | 0.07  | 29    | 0.08 |
| unclassified_Chitinophagaceae     | 206  | 0.56 | 422 | 1.15 | 12    | 0.03  | 130  | 0.35  | 24    | 0.07 |
| Cytophaga                         | 89   | 0.24 | 11  | 0.03 | 0     | 0     | 0    | 0     | 4     | 0.01 |
| unclassified_Lachnospiraceae      | 4    | 0.01 | 8   | 0.02 | 1     | 0     | 9    | 0.02  | 4     | 0.01 |
| Nitratireductor                   | 42   | 0.11 | 112 | 0.3  | 0     | 0     | 19   | 0.05  | 13    | 0.04 |

|                                  |      |      |      |      |     |      |      |      |     |      |
|----------------------------------|------|------|------|------|-----|------|------|------|-----|------|
| unclassified_Desulfarculaceae    | 107  | 0.29 | 81   | 0.22 | 9   | 0.02 | 91   | 0.25 | 25  | 0.07 |
| unclassified_Nitrospinaceae      | 145  | 0.39 | 155  | 0.42 | 13  | 0.04 | 115  | 0.31 | 29  | 0.08 |
| Propionivibrio                   | 3    | 0.01 | 9    | 0.02 | 0   | 0    | 16   | 0.04 | 0   | 0    |
| Intrasporangium                  | 15   | 0.04 | 32   | 0.09 | 0   | 0    | 10   | 0.03 | 20  | 0.05 |
| Acidothermus                     | 44   | 0.12 | 46   | 0.12 | 8   | 0.02 | 10   | 0.03 | 36  | 0.1  |
| Pseudorhodoferax                 | 0    | 0    | 0    | 0    | 2   | 0.01 | 0    | 0    | 0   | 0    |
| I-8                              | 5    | 0.01 | 4    | 0.01 | 0   | 0    | 1    | 0    | 0   | 0    |
| Microbacterium                   | 19   | 0.05 | 25   | 0.07 | 1   | 0    | 10   | 0.03 | 16  | 0.04 |
| Syntrophus                       | 4    | 0.01 | 2    | 0.01 | 1   | 0    | 1    | 0    | 0   | 0    |
| Brevibacillus                    | 1    | 0    | 0    | 0    | 0   | 0    | 1    | 0    | 3   | 0.01 |
| unclassified_Ruminococcaceae     | 26   | 0.07 | 54   | 0.15 | 4   | 0.01 | 10   | 0.03 | 6   | 0.02 |
| Clostridium_sensu_stricto_10     | 1    | 0    | 0    | 0    | 0   | 0    | 3    | 0.01 | 1   | 0    |
| unclassified_Beijerinckiaceae    | 7    | 0.02 | 3    | 0.01 | 2   | 0.01 | 3    | 0.01 | 3   | 0.01 |
| Desulforhopalus                  | 5    | 0.01 | 4    | 0.01 | 0   | 0    | 3    | 0.01 | 0   | 0    |
| Olsenella                        | 0    | 0    | 1    | 0    | 0   | 0    | 0    | 0    | 3   | 0.01 |
| Pullulanibacillus                | 0    | 0    | 0    | 0    | 0   | 0    | 0    | 0    | 1   | 0    |
| Granulosicoccus                  | 1    | 0    | 2    | 0.01 | 0   | 0    | 0    | 0    | 0   | 0    |
| Syntrophobacter                  | 6    | 0.02 | 14   | 0.04 | 2   | 0.01 | 13   | 0.04 | 11  | 0.03 |
| Sporomusa                        | 0    | 0    | 2    | 0.01 | 0   | 0    | 1    | 0    | 0   | 0    |
| Kaistia                          | 2    | 0.01 | 2    | 0.01 | 1   | 0    | 1    | 0    | 1   | 0    |
| Thioalkalispira                  | 6    | 0.02 | 3    | 0.01 | 0   | 0    | 5    | 0.01 | 2   | 0.01 |
| Gloeobacter                      | 1    | 0    | 0    | 0    | 0   | 0    | 0    | 0    | 0   | 0    |
| Plantactinospira                 | 0    | 0    | 1    | 0    | 0   | 0    | 1    | 0    | 0   | 0    |
| AEGEAN-169_marine_group          | 0    | 0    | 2    | 0.01 | 0   | 0    | 0    | 0    | 0   | 0    |
| Comamonas                        | 19   | 0.05 | 21   | 0.06 | 11  | 0.03 | 12   | 0.03 | 10  | 0.03 |
| unclassified_Polyangiaceae       | 5    | 0.01 | 4    | 0.01 | 0   | 0    | 0    | 0    | 3   | 0.01 |
| Chondromyces                     | 30   | 0.08 | 16   | 0.04 | 2   | 0.01 | 2    | 0.01 | 9   | 0.02 |
| Rhodovulum                       | 5    | 0.01 | 2    | 0.01 | 0   | 0    | 1    | 0    | 0   | 0    |
| Candidatus_Nostocoida            | 0    | 0    | 1    | 0    | 0   | 0    | 0    | 0    | 0   | 0    |
| Desulfonatronum                  | 36   | 0.1  | 19   | 0.05 | 4   | 0.01 | 17   | 0.05 | 7   | 0.02 |
| Polaromonas                      | 52   | 0.14 | 23   | 0.06 | 0   | 0    | 56   | 0.15 | 2   | 0.01 |
| Pelosinus                        | 0    | 0    | 5    | 0.01 | 1   | 0    | 1    | 0    | 2   | 0.01 |
| Peredibacter                     | 5    | 0.01 | 14   | 0.04 | 0   | 0    | 0    | 0    | 3   | 0.01 |
| CL500-29_marine_group            | 65   | 0.18 | 225  | 0.61 | 16  | 0.04 | 69   | 0.19 | 28  | 0.08 |
| Synechococcus                    | 0    | 0    | 0    | 0    | 0   | 0    | 0    | 0    | 1   | 0    |
| unclassified_Synergistaceae      | 94   | 0.26 | 92   | 0.25 | 23  | 0.06 | 54   | 0.15 | 74  | 0.2  |
| Sandarakinorhabdus               | 0    | 0    | 1    | 0    | 0   | 0    | 0    | 0    | 0   | 0    |
| Bradyrhizobium                   | 204  | 0.55 | 693  | 1.88 | 21  | 0.06 | 215  | 0.58 | 52  | 0.14 |
| Demetria                         | 2    | 0.01 | 0    | 0    | 0   | 0    | 1    | 0    | 0   | 0    |
| Arenimonas                       | 164  | 0.45 | 278  | 0.76 | 7   | 0.02 | 30   | 0.08 | 11  | 0.03 |
| Blastocatella                    | 2370 | 6.44 | 1387 | 3.77 | 27  | 0.07 | 724  | 1.97 | 146 | 0.4  |
| unclassified_Thiotrichaceae      | 4    | 0.01 | 2    | 0.01 | 0   | 0    | 0    | 0    | 2   | 0.01 |
| Spirosoma                        | 0    | 0    | 0    | 0    | 0   | 0    | 1    | 0    | 0   | 0    |
| Thioalkalivibrio                 | 0    | 0    | 1    | 0    | 0   | 0    | 0    | 0    | 0   | 0    |
| unclassified_Caulobacteraceae    | 47   | 0.13 | 56   | 0.15 | 6   | 0.02 | 18   | 0.05 | 10  | 0.03 |
| Desulfonatronobacter             | 1    | 0    | 1    | 0    | 0   | 0    | 0    | 0    | 0   | 0    |
| Sporichthya                      | 55   | 0.15 | 50   | 0.14 | 6   | 0.02 | 14   | 0.04 | 38  | 0.1  |
| Zymomonas                        | 94   | 0.26 | 28   | 0.08 | 9   | 0.02 | 55   | 0.15 | 5   | 0.01 |
| Rickettsia                       | 5    | 0.01 | 2    | 0.01 | 0   | 0    | 2    | 0.01 | 1   | 0    |
| Undibacterium                    | 7    | 0.02 | 21   | 0.06 | 3   | 0.01 | 11   | 0.03 | 0   | 0    |
| Luteimonas                       | 2    | 0.01 | 3    | 0.01 | 1   | 0    | 0    | 0    | 0   | 0    |
| unclassified_Comamonadaceae      | 281  | 0.76 | 508  | 1.38 | 181 | 0.49 | 352  | 0.96 | 104 | 0.28 |
| Desulfacinum                     | 50   | 0.14 | 19   | 0.05 | 14  | 0.04 | 20   | 0.05 | 9   | 0.02 |
| Thermoanaerobaculum              | 52   | 0.14 | 37   | 0.1  | 4   | 0.01 | 5    | 0.01 | 2   | 0.01 |
| Rhodobacter                      | 3    | 0.01 | 3    | 0.01 | 0   | 0    | 0    | 0    | 1   | 0    |
| Carnobacterium                   | 0    | 0    | 0    | 0    | 0   | 0    | 0    | 0    | 2   | 0.01 |
| Truepera                         | 0    | 0    | 2    | 0.01 | 0   | 0    | 0    | 0    | 0   | 0    |
| unclassified_Bradyrhizobiaceae   | 30   | 0.08 | 38   | 0.1  | 2   | 0.01 | 11   | 0.03 | 10  | 0.03 |
| Methylothermus                   | 1    | 0    | 1    | 0    | 0   | 0    | 0    | 0    | 0   | 0    |
| Pir4_lineage                     | 58   | 0.16 | 151  | 0.41 | 15  | 0.04 | 27   | 0.07 | 33  | 0.09 |
| Flavobacterium                   | 177  | 0.48 | 217  | 0.59 | 13  | 0.04 | 306  | 0.83 | 33  | 0.09 |
| Candidatus_Entotheonella         | 116  | 0.32 | 101  | 0.27 | 2   | 0.01 | 31   | 0.08 | 3   | 0.01 |
| Nocardia                         | 5    | 0.01 | 8    | 0.02 | 1   | 0    | 16   | 0.04 | 30  | 0.08 |
| Novosphingobium                  | 552  | 1.5  | 529  | 1.44 | 61  | 0.17 | 540  | 1.47 | 215 | 0.58 |
| Paucimonas                       | 2    | 0.01 | 1    | 0    | 0   | 0    | 0    | 0    | 0   | 0    |
| Pseudolabrys                     | 10   | 0.03 | 18   | 0.05 | 3   | 0.01 | 8    | 0.02 | 8   | 0.02 |
| Sphingomonas                     | 1841 | 5    | 796  | 2.16 | 207 | 0.56 | 1382 | 3.75 | 140 | 0.38 |
| Segetibacter                     | 1    | 0    | 0    | 0    | 0   | 0    | 0    | 0    | 0   | 0    |
| Cryptanaerobacter                | 0    | 0    | 0    | 0    | 0   | 0    | 0    | 0    | 1   | 0    |
| unclassified_Erysipelotrichaceae | 1    | 0    | 0    | 0    | 0   | 0    | 0    | 0    | 0   | 0    |
| Desulfocapsa                     | 20   | 0.05 | 11   | 0.03 | 1   | 0    | 12   | 0.03 | 9   | 0.02 |

|                                   |      |      |      |      |     |      |     |      |     |      |
|-----------------------------------|------|------|------|------|-----|------|-----|------|-----|------|
| Holophaga                         | 1    | 0    | 0    | 0    | 0   | 0    | 68  | 0.18 | 0   | 0    |
| Caldisericum                      | 0    | 0    | 2    | 0.01 | 0   | 0    | 0   | 0    | 0   | 0    |
| Methanomassiliicoccus             | 4    | 0.01 | 1    | 0    | 1   | 0    | 0   | 0    | 1   | 0    |
| unclassified_Clostridiaceae       | 1    | 0    | 1    | 0    | 0   | 0    | 0   | 0    | 0   | 0    |
| NS10_marine_group                 | 9    | 0.02 | 0    | 0    | 0   | 0    | 0   | 0    | 0   | 0    |
| unclassified_Thermotogaceae       | 1    | 0    | 1    | 0    | 0   | 0    | 0   | 0    | 0   | 0    |
| Candidatus_Amoebophilus           | 0    | 0    | 0    | 0    | 1   | 0    | 1   | 0    | 1   | 0    |
| Candidatus_Hepatincola            | 0    | 0    | 0    | 0    | 0   | 0    | 1   | 0    | 0   | 0    |
| Kluyvera                          | 0    | 0    | 0    | 0    | 2   | 0.01 | 0   | 0    | 33  | 0.09 |
| Z195MB87                          | 27   | 0.07 | 34   | 0.09 | 2   | 0.01 | 6   | 0.02 | 3   | 0.01 |
| Geodermatophilus                  | 4    | 0.01 | 17   | 0.05 | 0   | 0    | 5   | 0.01 | 3   | 0.01 |
| Dyella                            | 0    | 0    | 0    | 0    | 3   | 0.01 | 0   | 0    | 0   | 0    |
| unclassified_Streptosporangiaceae | 2    | 0.01 | 5    | 0.01 | 1   | 0    | 6   | 0.02 | 1   | 0    |
| Nitrosococcus                     | 127  | 0.34 | 330  | 0.9  | 42  | 0.11 | 182 | 0.49 | 218 | 0.59 |
| Paucibacter                       | 0    | 0    | 2    | 0.01 | 0   | 0    | 1   | 0    | 0   | 0    |
| Pir3_lineage                      | 0    | 0    | 1    | 0    | 0   | 0    | 0   | 0    | 0   | 0    |
| Rhodovibrio                       | 2    | 0.01 | 0    | 0    | 0   | 0    | 0   | 0    | 0   | 0    |
| Gemmatimonas                      | 92   | 0.25 | 128  | 0.35 | 6   | 0.02 | 43  | 0.12 | 30  | 0.08 |
| Rhizomicrobium                    | 44   | 0.12 | 31   | 0.08 | 2   | 0.01 | 21  | 0.06 | 5   | 0.01 |
| Maritimimonas                     | 3    | 0.01 | 0    | 0    | 0   | 0    | 0   | 0    | 0   | 0    |
| Weeksella                         | 1    | 0    | 0    | 0    | 0   | 0    | 0   | 0    | 0   | 0    |
| Pelomonas                         | 1    | 0    | 0    | 0    | 0   | 0    | 0   | 0    | 0   | 0    |
| Sporobacter                       | 0    | 0    | 1    | 0    | 0   | 0    | 0   | 0    | 0   | 0    |
| Dehalobium                        | 4    | 0.01 | 9    | 0.02 | 0   | 0    | 3   | 0.01 | 3   | 0.01 |
| Inhella                           | 5    | 0.01 | 4    | 0.01 | 0   | 0    | 0   | 0    | 0   | 0    |
| Oryzihumus                        | 2    | 0.01 | 5    | 0.01 | 0   | 0    | 1   | 0    | 2   | 0.01 |
| Cryptosporangium                  | 3    | 0.01 | 4    | 0.01 | 0   | 0    | 0   | 0    | 0   | 0    |
| Proteiniclasticum                 | 0    | 0    | 1    | 0    | 0   | 0    | 0   | 0    | 0   | 0    |
| Deinococcus                       | 0    | 0    | 1    | 0    | 0   | 0    | 0   | 0    | 0   | 0    |
| Megasphaera                       | 3    | 0.01 | 0    | 0    | 0   | 0    | 0   | 0    | 0   | 0    |
| Aquicella                         | 78   | 0.21 | 88   | 0.24 | 26  | 0.07 | 46  | 0.12 | 48  | 0.13 |
| SEEP-SRB2                         | 4    | 0.01 | 8    | 0.02 | 0   | 0    | 2   | 0.01 | 4   | 0.01 |
| Halarsenatibacter                 | 2    | 0.01 | 0    | 0    | 0   | 0    | 0   | 0    | 1   | 0    |
| unclassified_Desulfovibrionaceae  | 1    | 0    | 2    | 0.01 | 0   | 0    | 1   | 0    | 0   | 0    |
| Telmatobacter                     | 3    | 0.01 | 1    | 0    | 0   | 0    | 1   | 0    | 0   | 0    |
| Phyllobacterium                   | 1    | 0    | 0    | 0    | 0   | 0    | 0   | 0    | 0   | 0    |
| Nocardioides                      | 116  | 0.32 | 226  | 0.61 | 3   | 0.01 | 77  | 0.21 | 63  | 0.17 |
| Dechloromonas                     | 1    | 0    | 2    | 0.01 | 0   | 0    | 2   | 0.01 | 2   | 0.01 |
| Defluviimonas                     | 13   | 0.04 | 4    | 0.01 | 0   | 0    | 4   | 0.01 | 1   | 0    |
| Arenicella                        | 0    | 0    | 0    | 0    | 0   | 0    | 1   | 0    | 0   | 0    |
| Streptacidiphilus                 | 3    | 0.01 | 6    | 0.02 | 1   | 0    | 2   | 0.01 | 8   | 0.02 |
| Microbulbifer                     | 4    | 0.01 | 0    | 0    | 0   | 0    | 0   | 0    | 0   | 0    |
| Clostridium_sensu_stricto_12      | 0    | 0    | 1    | 0    | 2   | 0.01 | 3   | 0.01 | 1   | 0    |
| Spirochaeta                       | 2    | 0.01 | 6    | 0.02 | 0   | 0    | 1   | 0    | 1   | 0    |
| Clostridium_sensu_stricto_9       | 1    | 0    | 4    | 0.01 | 1   | 0    | 37  | 0.1  | 4   | 0.01 |
| Hydrocarboniphaga                 | 8    | 0.02 | 0    | 0    | 1   | 0    | 4   | 0.01 | 0   | 0    |
| Verrucomicrobium                  | 0    | 0    | 5    | 0.01 | 0   | 0    | 0   | 0    | 1   | 0    |
| Sandaracinobacter                 | 0    | 0    | 1    | 0    | 0   | 0    | 0   | 0    | 0   | 0    |
| Rhodanobacter                     | 124  | 0.34 | 693  | 1.88 | 14  | 0.04 | 79  | 0.21 | 9   | 0.02 |
| Azospira                          | 1399 | 3.8  | 1260 | 3.42 | 146 | 0.4  | 706 | 1.92 | 899 | 2.44 |
| Desulfitobacterium                | 0    | 0    | 0    | 0    | 0   | 0    | 1   | 0    | 0   | 0    |
| Bauldia                           | 21   | 0.06 | 24   | 0.07 | 0   | 0    | 10  | 0.03 | 5   | 0.01 |
| Phycicola                         | 3    | 0.01 | 11   | 0.03 | 0   | 0    | 1   | 0    | 18  | 0.05 |
| Candidatus_Endoecteinascidia      | 7    | 0.02 | 8    | 0.02 | 0   | 0    | 4   | 0.01 | 3   | 0.01 |
| Desulfobulbus                     | 24   | 0.07 | 28   | 0.08 | 1   | 0    | 16  | 0.04 | 16  | 0.04 |
| Fontimonas                        | 1    | 0    | 0    | 0    | 0   | 0    | 0   | 0    | 0   | 0    |
| Klebsiella                        | 0    | 0    | 0    | 0    | 2   | 0.01 | 0   | 0    | 1   | 0    |
| Enterobacter                      | 80   | 0.22 | 9    | 0.02 | 821 | 2.23 | 20  | 0.05 | 638 | 1.73 |
| Hirschia                          | 39   | 0.11 | 18   | 0.05 | 1   | 0    | 11  | 0.03 | 4   | 0.01 |
| Syntrophorhabdus                  | 100  | 0.27 | 36   | 0.1  | 12  | 0.03 | 45  | 0.12 | 22  | 0.06 |
| Cloacibacterium                   | 0    | 0    | 1    | 0    | 0   | 0    | 0   | 0    | 0   | 0    |
| Dyadobacter                       | 0    | 0    | 0    | 0    | 0   | 0    | 1   | 0    | 0   | 0    |
| Desulfofaba                       | 0    | 0    | 2    | 0.01 | 0   | 0    | 1   | 0    | 1   | 0    |
| Mucilaginibacter                  | 6    | 0.02 | 0    | 0    | 61  | 0.17 | 0   | 0    | 0   | 0    |
| Atopococcus                       | 0    | 0    | 0    | 0    | 0   | 0    | 0   | 0    | 1   | 0    |
| Knoellia                          | 1    | 0    | 0    | 0    | 0   | 0    | 0   | 0    | 0   | 0    |
| Aquabacter                        | 0    | 0    | 0    | 0    | 0   | 0    | 1   | 0    | 0   | 0    |
| Microlunatus                      | 23   | 0.06 | 24   | 0.07 | 2   | 0.01 | 9   | 0.02 | 13  | 0.04 |
| Acidicaldus                       | 7    | 0.02 | 2    | 0.01 | 0   | 0    | 0   | 0    | 1   | 0    |
| Candidatus_Proteochlamydia        | 76   | 0.21 | 87   | 0.24 | 5   | 0.01 | 30  | 0.08 | 21  | 0.06 |
| Mariprofundus                     | 10   | 0.03 | 8    | 0.02 | 3   | 0.01 | 4   | 0.01 | 2   | 0.01 |



|                                |      |       |      |      |     |      |      |      |      |       |
|--------------------------------|------|-------|------|------|-----|------|------|------|------|-------|
| Nitrospina                     | 69   | 0.19  | 40   | 0.11 | 7   | 0.02 | 20   | 0.05 | 13   | 0.04  |
| Steroidobacter                 | 126  | 0.34  | 140  | 0.38 | 4   | 0.01 | 132  | 0.36 | 6    | 0.02  |
| Thermomonas                    | 168  | 0.46  | 734  | 1.99 | 216 | 0.59 | 134  | 0.36 | 72   | 0.2   |
| Cupriavidus                    | 42   | 0.11  | 114  | 0.31 | 314 | 0.85 | 730  | 1.98 | 370  | 1     |
| unclassified_Phylobacteriaceae | 3    | 0.01  | 1    | 0    | 0   | 0    | 0    | 0    | 0    | 0     |
| Raoultella                     | 56   | 0.15  | 313  | 0.85 | 49  | 0.13 | 38   | 0.1  | 3    | 0.01  |
| Lapillicoccus                  | 2    | 0.01  | 16   | 0.04 | 1   | 0    | 0    | 0    | 0    | 0     |
| Pir2_lineage                   | 0    | 0     | 1    | 0    | 0   | 0    | 0    | 0    | 0    | 0     |
| Amycolatopsis                  | 0    | 0     | 0    | 0    | 0   | 0    | 1    | 0    | 0    | 0     |
| Desulfonema                    | 2    | 0.01  | 0    | 0    | 0   | 0    | 0    | 0    | 0    | 0     |
| Rahnella                       | 0    | 0     | 0    | 0    | 0   | 0    | 0    | 0    | 4    | 0.01  |
| Clostridium_sensu_stricto_5    | 1    | 0     | 0    | 0    | 0   | 0    | 0    | 0    | 2    | 0.01  |
| Haloferula                     | 5    | 0.01  | 17   | 0.05 | 3   | 0.01 | 13   | 0.04 | 1    | 0     |
| Subdoligranulum                | 3    | 0.01  | 1    | 0    | 0   | 0    | 0    | 0    | 0    | 0     |
| unclassified_Saprosiraceae     | 92   | 0.25  | 61   | 0.17 | 4   | 0.01 | 12   | 0.03 | 8    | 0.02  |
| Singulisphaera                 | 7    | 0.02  | 16   | 0.04 | 3   | 0.01 | 2    | 0.01 | 5    | 0.01  |
| Acetobacter                    | 2    | 0.01  | 0    | 0    | 0   | 0    | 0    | 0    | 0    | 0     |
| Schlesneria                    | 34   | 0.09  | 30   | 0.08 | 0   | 0    | 6    | 0.02 | 3    | 0.01  |
| Methylocystis                  | 1    | 0     | 0    | 0    | 0   | 0    | 0    | 0    | 0    | 0     |
| NSS_marine_group               | 0    | 0     | 0    | 0    | 0   | 0    | 1    | 0    | 0    | 0     |
| Thermoleophilum                | 8    | 0.02  | 15   | 0.04 | 1   | 0    | 7    | 0.02 | 12   | 0.03  |
| Clostridium_sensu_stricto_8    | 2    | 0.01  | 1    | 0    | 0   | 0    | 4    | 0.01 | 3    | 0.01  |
| Planotetraspora                | 10   | 0.03  | 17   | 0.05 | 2   | 0.01 | 8    | 0.02 | 28   | 0.08  |
| Arthrobacter                   | 52   | 0.14  | 476  | 1.29 | 6   | 0.02 | 250  | 0.68 | 140  | 0.38  |
| Azospirillum                   | 41   | 0.11  | 12   | 0.03 | 0   | 0    | 5    | 0.01 | 2    | 0.01  |
| Chthonomonas                   | 13   | 0.04  | 9    | 0.02 | 0   | 0    | 0    | 0    | 3    | 0.01  |
| Fonticella                     | 1    | 0     | 3    | 0.01 | 2   | 0.01 | 49   | 0.13 | 2    | 0.01  |
| Thermobispora                  | 0    | 0     | 0    | 0    | 1   | 0    | 0    | 0    | 0    | 0     |
| Leucobacter                    | 3    | 0.01  | 2    | 0.01 | 1   | 0    | 2    | 0.01 | 6    | 0.02  |
| Cryomorpha                     | 6    | 0.02  | 0    | 0    | 0   | 0    | 0    | 0    | 0    | 0     |
| Desulfovira                    | 1    | 0     | 1    | 0    | 0   | 0    | 0    | 0    | 0    | 0     |
| Paenibacillus                  | 15   | 0.04  | 81   | 0.22 | 9   | 0.02 | 15   | 0.04 | 62   | 0.17  |
| Rubellimicrobium               | 4    | 0.01  | 4    | 0.01 | 1   | 0    | 0    | 0    | 0    | 0     |
| Streptomyces                   | 273  | 0.74  | 309  | 0.84 | 73  | 0.2  | 93   | 0.25 | 271  | 0.74  |
| Sporosarcina                   | 0    | 0     | 0    | 0    | 0   | 0    | 0    | 0    | 2    | 0.01  |
| Dehalogenimonas                | 2    | 0.01  | 3    | 0.01 | 1   | 0    | 0    | 0    | 1    | 0     |
| Aquisalimonas                  | 1    | 0     | 6    | 0.02 | 0   | 0    | 1    | 0    | 1    | 0     |
| Gemmata                        | 107  | 0.29  | 145  | 0.39 | 7   | 0.02 | 59   | 0.16 | 8    | 0.02  |
| Candidatus_Liberibacter        | 13   | 0.04  | 11   | 0.03 | 0   | 0    | 7    | 0.02 | 6    | 0.02  |
| Rhodopirellula                 | 3    | 0.01  | 8    | 0.02 | 0   | 0    | 4    | 0.01 | 0    | 0     |
| Parasegetibacter               | 19   | 0.05  | 19   | 0.05 | 0   | 0    | 4    | 0.01 | 1    | 0     |
| Spirulina                      | 0    | 0     | 0    | 0    | 0   | 0    | 2    | 0.01 | 0    | 0     |
| Anaeromyxobacter               | 83   | 0.23  | 81   | 0.22 | 4   | 0.01 | 328  | 0.89 | 18   | 0.05  |
| unclassified_Paenibacillaceae  | 0    | 0     | 0    | 0    | 0   | 0    | 1    | 0    | 2    | 0.01  |
| Candidatus_Xiphinematobacter   | 294  | 0.8   | 1010 | 2.74 | 117 | 0.32 | 228  | 0.62 | 278  | 0.76  |
| Smaragdicoccus                 | 6    | 0.02  | 6    | 0.02 | 0   | 0    | 3    | 0.01 | 12   | 0.03  |
| unclassified_Gemmatimonadacea  | 1403 | 3.81  | 1010 | 2.74 | 89  | 0.24 | 666  | 1.81 | 316  | 0.86  |
| unclassified_Methylophilaceae  | 18   | 0.05  | 7    | 0.02 | 0   | 0    | 2    | 0.01 | 0    | 0     |
| LD28_freshwater_group          | 2    | 0.01  | 1    | 0    | 0   | 0    | 0    | 0    | 0    | 0     |
| Catellatospora                 | 14   | 0.04  | 10   | 0.03 | 3   | 0.01 | 4    | 0.01 | 9    | 0.02  |
| Edaphobacter                   | 0    | 0     | 0    | 0    | 1   | 0    | 0    | 0    | 0    | 0     |
| unclassified_Coxiellaceae      | 8    | 0.02  | 3    | 0.01 | 0   | 0    | 1    | 0    | 6    | 0.02  |
| Prochlorococcus                | 1    | 0     | 3    | 0.01 | 0   | 0    | 0    | 0    | 1    | 0     |
| unclassified_Helicobacteraceae | 2    | 0.01  | 1    | 0    | 0   | 0    | 0    | 0    | 0    | 0     |
| Dehalobacter                   | 0    | 0     | 1    | 0    | 0   | 0    | 6    | 0.02 | 0    | 0     |
| Alicyclophilus                 | 10   | 0.03  | 19   | 0.05 | 0   | 0    | 50   | 0.14 | 1    | 0     |
| Pseudoclavibacter              | 0    | 0     | 0    | 0    | 0   | 0    | 0    | 0    | 1    | 0     |
| unclassified_Simkaniaceae      | 67   | 0.18  | 80   | 0.22 | 4   | 0.01 | 28   | 0.08 | 19   | 0.05  |
| Nitrosomonas                   | 18   | 0.05  | 28   | 0.08 | 0   | 0    | 0    | 0    | 0    | 0     |
| Serratia                       | 9    | 0.02  | 7    | 0.02 | 2   | 0.01 | 1    | 0    | 5349 | 14.53 |
| Deferrisoma                    | 4    | 0.01  | 3    | 0.01 | 1   | 0    | 3    | 0.01 | 0    | 0     |
| Craurococcus                   | 0    | 0     | 2    | 0.01 | 0   | 0    | 1    | 0    | 0    | 0     |
| Marvinbryantia                 | 0    | 0     | 1    | 0    | 0   | 0    | 0    | 0    | 0    | 0     |
| Herminiimonas                  | 0    | 0     | 1    | 0    | 0   | 0    | 0    | 0    | 1    | 0     |
| Rivibacter                     | 5    | 0.01  | 18   | 0.05 | 0   | 0    | 12   | 0.03 | 4    | 0.01  |
| Crossiella                     | 1    | 0     | 2    | 0.01 | 0   | 0    | 0    | 0    | 2    | 0.01  |
| unclassified                   | 5710 | 15.51 | 2912 | 7.91 | 244 | 0.66 | 1709 | 4.64 | 980  | 2.66  |
| Candidatus_Anammoximicrobium   | 4    | 0.01  | 6    | 0.02 | 0   | 0    | 1    | 0    | 0    | 0     |
| unclassified_Syntrophaceae     | 66   | 0.18  | 31   | 0.08 | 7   | 0.02 | 25   | 0.07 | 22   | 0.06  |
| Magnetospirillum               | 1    | 0     | 3    | 0.01 | 0   | 0    | 0    | 0    | 0    | 0     |
| Anaerovorax                    | 0    | 0     | 0    | 0    | 0   | 0    | 3    | 0.01 | 0    | 0     |

|                                  |      |      |     |      |     |      |     |      |     |      |
|----------------------------------|------|------|-----|------|-----|------|-----|------|-----|------|
| Smithella                        | 84   | 0.23 | 59  | 0.16 | 4   | 0.01 | 14  | 0.04 | 12  | 0.03 |
| Paludibacter                     | 1    | 0    | 1   | 0    | 1   | 0    | 0   | 0    | 0   | 0    |
| Desulforhabdus                   | 6    | 0.02 | 9   | 0.02 | 0   | 0    | 1   | 0    | 4   | 0.01 |
| Ornatilinea                      | 395  | 1.07 | 253 | 0.69 | 15  | 0.04 | 217 | 0.59 | 50  | 0.14 |
| Azohydromonas                    | 1    | 0    | 3   | 0.01 | 0   | 0    | 1   | 0    | 0   | 0    |
| Cystobacter                      | 2    | 0.01 | 3   | 0.01 | 0   | 0    | 12  | 0.03 | 5   | 0.01 |
| Bacteroides                      | 0    | 0    | 1   | 0    | 0   | 0    | 0   | 0    | 0   | 0    |
| Longispora                       | 9    | 0.02 | 17  | 0.05 | 2   | 0.01 | 4   | 0.01 | 1   | 0    |
| Vogesella                        | 4    | 0.01 | 3   | 0.01 | 0   | 0    | 0   | 0    | 0   | 0    |
| Candidatus_Saccharimonas         | 35   | 0.1  | 29  | 0.08 | 6   | 0.02 | 11  | 0.03 | 21  | 0.06 |
| Kitasatospora                    | 87   | 0.24 | 115 | 0.31 | 27  | 0.07 | 26  | 0.07 | 92  | 0.25 |
| Chelatococcus                    | 28   | 0.08 | 34  | 0.09 | 6   | 0.02 | 13  | 0.04 | 30  | 0.08 |
| Shimazuella                      | 5    | 0.01 | 4   | 0.01 | 0   | 0    | 1   | 0    | 6   | 0.02 |
| Lacibacter                       | 2    | 0.01 | 0   | 0    | 0   | 0    | 0   | 0    | 0   | 0    |
| Actinocorallia                   | 1    | 0    | 3   | 0.01 | 2   | 0.01 | 1   | 0    | 2   | 0.01 |
| Flavisolibacter                  | 39   | 0.11 | 31  | 0.08 | 2   | 0.01 | 18  | 0.05 | 4   | 0.01 |
| Planosporangium                  | 26   | 0.07 | 21  | 0.06 | 0   | 0    | 10  | 0.03 | 29  | 0.08 |
| Weissella                        | 0    | 0    | 0   | 0    | 5   | 0.01 | 2   | 0.01 | 0   | 0    |
| Magnetococcus                    | 0    | 0    | 1   | 0    | 0   | 0    | 0   | 0    | 0   | 0    |
| Pelotomaculum                    | 0    | 0    | 1   | 0    | 0   | 0    | 0   | 0    | 3   | 0.01 |
| Aureispira                       | 0    | 0    | 2   | 0.01 | 0   | 0    | 0   | 0    | 0   | 0    |
| Nitriliruptor                    | 6    | 0.02 | 4   | 0.01 | 2   | 0.01 | 1   | 0    | 8   | 0.02 |
| Aeromonas                        | 3    | 0.01 | 1   | 0    | 17  | 0.05 | 10  | 0.03 | 3   | 0.01 |
| unclassified_Desulfurellaceae    | 110  | 0.3  | 86  | 0.23 | 10  | 0.03 | 51  | 0.14 | 11  | 0.03 |
| Vibrio                           | 1    | 0    | 0   | 0    | 0   | 0    | 0   | 0    | 0   | 0    |
| Alistipes                        | 0    | 0    | 0   | 0    | 0   | 0    | 0   | 0    | 1   | 0    |
| Lactococcus                      | 1    | 0    | 0   | 0    | 0   | 0    | 1   | 0    | 0   | 0    |
| Achromobacter                    | 156  | 0.42 | 155 | 0.42 | 144 | 0.39 | 188 | 0.51 | 713 | 1.94 |
| Cedecea                          | 0    | 0    | 0   | 0    | 2   | 0.01 | 0   | 0    | 0   | 0    |
| Phenylobacterium                 | 74   | 0.2  | 106 | 0.29 | 64  | 0.17 | 373 | 1.01 | 22  | 0.06 |
| Sulfurovum                       | 9    | 0.02 | 12  | 0.03 | 0   | 0    | 2   | 0.01 | 0   | 0    |
| Candidatus_Latescibacter         | 160  | 0.43 | 112 | 0.3  | 10  | 0.03 | 79  | 0.21 | 40  | 0.11 |
| Simplicispira                    | 18   | 0.05 | 20  | 0.05 | 0   | 0    | 28  | 0.08 | 2   | 0.01 |
| Sulfurimonas                     | 3    | 0.01 | 3   | 0.01 | 0   | 0    | 0   | 0    | 1   | 0    |
| Byssovorax                       | 136  | 0.37 | 79  | 0.21 | 3   | 0.01 | 14  | 0.04 | 14  | 0.04 |
| Flaviumibacter                   | 3    | 0.01 | 15  | 0.04 | 0   | 0    | 1   | 0    | 0   | 0    |
| Atopobium                        | 0    | 0    | 1   | 0    | 0   | 0    | 1   | 0    | 0   | 0    |
| Ohtaekwangia                     | 25   | 0.07 | 3   | 0.01 | 0   | 0    | 4   | 0.01 | 1   | 0    |
| Sva0081_sediment_group           | 11   | 0.03 | 1   | 0    | 0   | 0    | 3   | 0.01 | 0   | 0    |
| Thermosipho                      | 1    | 0    | 0   | 0    | 0   | 0    | 0   | 0    | 0   | 0    |
| Pantoea                          | 1    | 0    | 0   | 0    | 488 | 1.33 | 1   | 0    | 505 | 1.37 |
| Isopterocola                     | 1    | 0    | 2   | 0.01 | 0   | 0    | 2   | 0.01 | 5   | 0.01 |
| Hyphomicrobium                   | 85   | 0.23 | 104 | 0.28 | 16  | 0.04 | 58  | 0.16 | 27  | 0.07 |
| Sporacetigenium                  | 0    | 0    | 0   | 0    | 1   | 0    | 193 | 0.52 | 1   | 0    |
| Candidatus_Kuenenia              | 9    | 0.02 | 3   | 0.01 | 0   | 0    | 5   | 0.01 | 1   | 0    |
| unclassified_Anaerolineaceae     | 632  | 1.72 | 617 | 1.68 | 57  | 0.15 | 179 | 0.49 | 207 | 0.56 |
| Litorilinea                      | 6    | 0.02 | 2   | 0.01 | 0   | 0    | 0   | 0    | 0   | 0    |
| Caenimonas                       | 17   | 0.05 | 30  | 0.08 | 16  | 0.04 | 14  | 0.04 | 0   | 0    |
| Marinobacter                     | 8    | 0.02 | 8   | 0.02 | 0   | 0    | 13  | 0.04 | 4   | 0.01 |
| Streptococcus                    | 0    | 0    | 0   | 0    | 0   | 0    | 1   | 0    | 0   | 0    |
| Urania-1B-19_marine_sediment_    | 27   | 0.07 | 5   | 0.01 | 3   | 0.01 | 4   | 0.01 | 4   | 0.01 |
| Desulforegula                    | 9    | 0.02 | 2   | 0.01 | 1   | 0    | 3   | 0.01 | 3   | 0.01 |
| unclassified_Rhodothermaceae     | 2    | 0.01 | 0   | 0    | 1   | 0    | 1   | 0    | 0   | 0    |
| Ferriphaselus                    | 0    | 0    | 1   | 0    | 0   | 0    | 0   | 0    | 0   | 0    |
| unclassified_Ectothiorhodospirac | 1    | 0    | 0   | 0    | 0   | 0    | 1   | 0    | 1   | 0    |
| Thermomicrobium                  | 6    | 0.02 | 15  | 0.04 | 2   | 0.01 | 1   | 0    | 7   | 0.02 |
| Criblamydia                      | 4    | 0.01 | 2   | 0.01 | 1   | 0    | 3   | 0.01 | 3   | 0.01 |
| Chitinophaga                     | 83   | 0.23 | 93  | 0.25 | 6   | 0.02 | 40  | 0.11 | 4   | 0.01 |
| Azoarcus                         | 32   | 0.09 | 43  | 0.12 | 2   | 0.01 | 40  | 0.11 | 6   | 0.02 |
| unclassified_Hyphomicrobiaceae   | 18   | 0.05 | 7   | 0.02 | 2   | 0.01 | 5   | 0.01 | 7   | 0.02 |
| Haliangium                       | 400  | 1.09 | 372 | 1.01 | 17  | 0.05 | 102 | 0.28 | 39  | 0.11 |
| Krasilnikovia                    | 4    | 0.01 | 4   | 0.01 | 0   | 0    | 1   | 0    | 1   | 0    |
| Candidatus_Methylomirabilis      | 15   | 0.04 | 9   | 0.02 | 1   | 0    | 2   | 0.01 | 1   | 0    |
| Isosphaera                       | 8    | 0.02 | 14  | 0.04 | 0   | 0    | 6   | 0.02 | 3   | 0.01 |
| unclassified_Planctomycetaceae   | 900  | 2.44 | 947 | 2.57 | 49  | 0.13 | 238 | 0.65 | 128 | 0.35 |
| unclassified_Desulfobacteraceae  | 26   | 0.07 | 15  | 0.04 | 2   | 0.01 | 6   | 0.02 | 9   | 0.02 |
| Desulfosalsimonas                | 0    | 0    | 1   | 0    | 0   | 0    | 0   | 0    | 0   | 0    |
| Spingopyxis                      | 1530 | 4.16 | 245 | 0.67 | 54  | 0.15 | 529 | 1.44 | 51  | 0.14 |
| Hydrogenophaga                   | 0    | 0    | 0   | 0    | 0   | 0    | 1   | 0    | 0   | 0    |
| Altererythrobacter               | 27   | 0.07 | 66  | 0.18 | 4   | 0.01 | 56  | 0.15 | 2   | 0.01 |
| Elstera                          | 1    | 0    | 1   | 0    | 1   | 0    | 0   | 0    | 0   | 0    |





|                                   |      |      |     |      |     |      |      |      |     |      |
|-----------------------------------|------|------|-----|------|-----|------|------|------|-----|------|
| unclassified_Methylobacteriaceae  | 13   | 0.04 | 8   | 0.02 | 0   | 0    | 3    | 0.01 | 6   | 0.02 |
| Nannocystis                       | 2    | 0.01 | 8   | 0.02 | 0   | 0    | 3    | 0.01 | 2   | 0.01 |
| Motilibacter                      | 0    | 0    | 1   | 0    | 0   | 0    | 0    | 0    | 0   | 0    |
| Coxiella                          | 7    | 0.02 | 16  | 0.04 | 1   | 0    | 7    | 0.02 | 9   | 0.02 |
| Chlamydia                         | 0    | 0    | 0   | 0    | 0   | 0    | 0    | 0    | 2   | 0.01 |
| unclassified_Desulfobulbaceae     | 47   | 0.13 | 35  | 0.1  | 7   | 0.02 | 27   | 0.07 | 16  | 0.04 |
| Bdellovibrio                      | 83   | 0.23 | 52  | 0.14 | 1   | 0    | 13   | 0.04 | 12  | 0.03 |
| Candidatus_Alysiosphaera          | 60   | 0.16 | 81  | 0.22 | 16  | 0.04 | 23   | 0.06 | 23  | 0.06 |
| Arcticibacter                     | 3    | 0.01 | 0   | 0    | 0   | 0    | 0    | 0    | 0   | 0    |
| Perlucidibaca                     | 1    | 0    | 4   | 0.01 | 1   | 0    | 221  | 0.6  | 0   | 0    |
| Candidatus_Accumulibacter         | 1    | 0    | 9   | 0.02 | 0   | 0    | 12   | 0.03 | 0   | 0    |
| Bryobacter                        | 92   | 0.25 | 194 | 0.53 | 14  | 0.04 | 129  | 0.35 | 22  | 0.06 |
| unclassified_Caldilineaceae       | 20   | 0.05 | 7   | 0.02 | 1   | 0    | 3    | 0.01 | 3   | 0.01 |
| Aeromicrobium                     | 35   | 0.1  | 240 | 0.65 | 6   | 0.02 | 340  | 0.92 | 33  | 0.09 |
| unclassified_Peptococcaceae       | 92   | 0.25 | 62  | 0.17 | 5   | 0.01 | 25   | 0.07 | 15  | 0.04 |
| unclassified_Xanthomonadales      | 24   | 0.07 | 169 | 0.46 | 13  | 0.04 | 194  | 0.53 | 23  | 0.06 |
| unclassified_Planococcaceae       | 0    | 0    | 2   | 0.01 | 0   | 0    | 0    | 0    | 0   | 0    |
| Sulfuritalea                      | 0    | 0    | 2   | 0.01 | 0   | 0    | 0    | 0    | 0   | 0    |
| Methylobacterium                  | 7    | 0.02 | 56  | 0.15 | 1   | 0    | 4    | 0.01 | 8   | 0.02 |
| unclassified_Chlamydiaceae        | 30   | 0.08 | 31  | 0.08 | 3   | 0.01 | 12   | 0.03 | 7   | 0.02 |
| Chthoniobacter                    | 115  | 0.31 | 198 | 0.54 | 4   | 0.01 | 63   | 0.17 | 24  | 0.07 |
| unclassified_Acidobacteriaceae    | 183  | 0.5  | 366 | 0.99 | 35  | 0.1  | 243  | 0.66 | 98  | 0.27 |
| Clostridium_sensu_stricto_6       | 0    | 0    | 0   | 0    | 0   | 0    | 0    | 0    | 2   | 0.01 |
| unclassified_Sphingomonadaceae    | 0    | 0    | 0   | 0    | 0   | 0    | 6    | 0.02 | 0   | 0    |
| Thermomonospora                   | 0    | 0    | 3   | 0.01 | 1   | 0    | 3    | 0.01 | 0   | 0    |
| unclassified_Verrucomicrobiaceae  | 19   | 0.05 | 34  | 0.09 | 5   | 0.01 | 18   | 0.05 | 5   | 0.01 |
| Cellvibrio                        | 8    | 0.02 | 0   | 0    | 0   | 0    | 2    | 0.01 | 0   | 0    |
| Hymenobacter                      | 3    | 0.01 | 0   | 0    | 0   | 0    | 0    | 0    | 0   | 0    |
| Geobacter                         | 177  | 0.48 | 303 | 0.82 | 12  | 0.03 | 398  | 1.08 | 48  | 0.13 |
| Phycoccus                         | 0    | 0    | 0   | 0    | 0   | 0    | 2    | 0.01 | 0   | 0    |
| Fictibacillus                     | 0    | 0    | 0   | 0    | 0   | 0    | 2    | 0.01 | 2   | 0.01 |
| Defluviococcus                    | 81   | 0.22 | 165 | 0.45 | 19  | 0.05 | 60   | 0.16 | 61  | 0.17 |
| Aquabacterium                     | 4    | 0.01 | 4   | 0.01 | 109 | 0.3  | 96   | 0.26 | 0   | 0    |
| Planomicrobium                    | 2    | 0.01 | 1   | 0    | 0   | 0    | 0    | 0    | 0   | 0    |
| Owenweeksia                       | 72   | 0.2  | 23  | 0.06 | 1   | 0    | 4    | 0.01 | 1   | 0    |
| unclassified_Marinilabiaceae      | 6    | 0.02 | 3   | 0.01 | 0   | 0    | 0    | 0    | 0   | 0    |
| Caldilinea                        | 1    | 0    | 0   | 0    | 0   | 0    | 0    | 0    | 0   | 0    |
| unclassified_Family               | 10   | 0.03 | 11  | 0.03 | 1   | 0    | 222  | 0.6  | 3   | 0.01 |
| unclassified_Acetobacteraceae     | 13   | 0.04 | 10  | 0.03 | 8   | 0.02 | 2    | 0.01 | 1   | 0    |
| Enhygromyxa                       | 15   | 0.04 | 12  | 0.03 | 0   | 0    | 2    | 0.01 | 1   | 0    |
| Sedimentibacter                   | 0    | 0    | 1   | 0    | 0   | 0    | 7    | 0.02 | 0   | 0    |
| Luteibacter                       | 1    | 0    | 0   | 0    | 70  | 0.19 | 0    | 0    | 0   | 0    |
| Pelobacter                        | 23   | 0.06 | 20  | 0.05 | 2   | 0.01 | 22   | 0.06 | 2   | 0.01 |
| Candidatus_Chloracidobacterium    | 21   | 0.06 | 15  | 0.04 | 0   | 0    | 11   | 0.03 | 1   | 0    |
| Tepidamorphus                     | 2    | 0.01 | 3   | 0.01 | 1   | 0    | 2    | 0.01 | 2   | 0.01 |
| Candidatus_Odyssella              | 19   | 0.05 | 10  | 0.03 | 0   | 0    | 2    | 0.01 | 5   | 0.01 |
| unclassified_Syntrophobacteraceae | 28   | 0.08 | 30  | 0.08 | 4   | 0.01 | 34   | 0.09 | 15  | 0.04 |
| unclassified_Halobacteroidaceae   | 0    | 0    | 0   | 0    | 0   | 0    | 1    | 0    | 0   | 0    |
| Clostridium_sensu_stricto_3       | 0    | 0    | 2   | 0.01 | 0   | 0    | 1    | 0    | 7   | 0.02 |
| Methylosinus                      | 0    | 0    | 1   | 0    | 0   | 0    | 0    | 0    | 0   | 0    |
| Aquamicrobium                     | 0    | 0    | 2   | 0.01 | 0   | 0    | 0    | 0    | 0   | 0    |
| Ferribacterium                    | 17   | 0.05 | 10  | 0.03 | 0   | 0    | 0    | 0    | 0   | 0    |
| Methylobacter                     | 2    | 0.01 | 4   | 0.01 | 1   | 0    | 1    | 0    | 0   | 0    |
| Panacagrionas                     | 17   | 0.05 | 49  | 0.13 | 0   | 0    | 30   | 0.08 | 0   | 0    |
| Acidiferrobacter                  | 25   | 0.07 | 8   | 0.02 | 1   | 0    | 10   | 0.03 | 5   | 0.01 |
| Candidatus_Brocadia               | 33   | 0.09 | 8   | 0.02 | 1   | 0    | 9    | 0.02 | 2   | 0.01 |
| Methylbium                        | 0    | 0    | 0   | 0    | 0   | 0    | 2    | 0.01 | 0   | 0    |
| Chlorochromatium                  | 3    | 0.01 | 2   | 0.01 | 0   | 0    | 0    | 0    | 0   | 0    |
| Nitrincola                        | 2    | 0.01 | 8   | 0.02 | 2   | 0.01 | 1    | 0    | 2   | 0.01 |
| Variovorax                        | 132  | 0.36 | 466 | 1.27 | 73  | 0.2  | 151  | 0.41 | 3   | 0.01 |
| Desulfuromonas                    | 41   | 0.11 | 31  | 0.08 | 2   | 0.01 | 41   | 0.11 | 3   | 0.01 |
| Rhodococcus                       | 1597 | 4.34 | 36  | 0.1  | 81  | 0.22 | 3293 | 8.94 | 635 | 1.72 |
| Rhizobium                         | 56   | 0.15 | 193 | 0.52 | 13  | 0.04 | 33   | 0.09 | 10  | 0.03 |
| MSBL7                             | 9    | 0.02 | 7   | 0.02 | 8   | 0.02 | 48   | 0.13 | 27  | 0.07 |
| Cycloclasticus                    | 24   | 0.07 | 9   | 0.02 | 3   | 0.01 | 5    | 0.01 | 1   | 0    |
| Lutispora                         | 0    | 0    | 7   | 0.02 | 2   | 0.01 | 208  | 0.56 | 1   | 0    |
| Acidocella                        | 2    | 0.01 | 0   | 0    | 0   | 0    | 0    | 0    | 0   | 0    |
| Clostridium_sensu_stricto_16      | 0    | 0    | 1   | 0    | 0   | 0    | 0    | 0    | 1   | 0    |
| Candidatus_Omnitrophus            | 9    | 0.02 | 6   | 0.02 | 0   | 0    | 1    | 0    | 1   | 0    |
| Actinophytocola                   | 4    | 0.01 | 2   | 0.01 | 1   | 0    | 0    | 0    | 1   | 0    |
| Gordonia                          | 0    | 0    | 1   | 0    | 0   | 0    | 0    | 0    | 1   | 0    |

|                                |    |      |    |      |    |      |     |      |     |      |
|--------------------------------|----|------|----|------|----|------|-----|------|-----|------|
| HotSeep-1                      | 1  | 0    | 2  | 0.01 | 0  | 0    | 2   | 0.01 | 1   | 0    |
| unclassified_Cryomorpaceae     | 13 | 0.04 | 1  | 0    | 0  | 0    | 1   | 0    | 1   | 0    |
| OM27_clade                     | 46 | 0.12 | 34 | 0.09 | 1  | 0    | 5   | 0.01 | 4   | 0.01 |
| Tatumella                      | 0  | 0    | 0  | 0    | 1  | 0    | 0   | 0    | 6   | 0.02 |
| Saccharospirillum              | 0  | 0    | 1  | 0    | 1  | 0    | 0   | 0    | 0   | 0    |
| unclassified_Rhodospirillaceae | 45 | 0.12 | 91 | 0.25 | 11 | 0.03 | 118 | 0.32 | 43  | 0.12 |
| Meganema                       | 3  | 0.01 | 4  | 0.01 | 2  | 0.01 | 1   | 0    | 3   | 0.01 |
| Neochlamydia                   | 24 | 0.07 | 43 | 0.12 | 5  | 0.01 | 16  | 0.04 | 16  | 0.04 |
| Albidiferax                    | 1  | 0    | 0  | 0    | 0  | 0    | 8   | 0.02 | 0   | 0    |
| Diplorickettsia                | 15 | 0.04 | 0  | 0    | 0  | 0    | 1   | 0    | 0   | 0    |
| Candidatus_Midichloria         | 0  | 0    | 0  | 0    | 0  | 0    | 1   | 0    | 0   | 0    |
| Asticcacaulis                  | 0  | 0    | 0  | 0    | 0  | 0    | 1   | 0    | 0   | 0    |
| Turneriella                    | 2  | 0.01 | 7  | 0.02 | 0  | 0    | 0   | 0    | 0   | 0    |
| Terribacillus                  | 0  | 0    | 1  | 0    | 0  | 0    | 0   | 0    | 0   | 0    |
| unclassified_Legionellaceae    | 0  | 0    | 3  | 0.01 | 0  | 0    | 0   | 0    | 0   | 0    |
| Angiococcus                    | 2  | 0.01 | 2  | 0.01 | 1  | 0    | 1   | 0    | 0   | 0    |
| Azotobacter                    | 0  | 0    | 0  | 0    | 2  | 0.01 | 0   | 0    | 4   | 0.01 |
| Afifella                       | 1  | 0    | 1  | 0    | 0  | 0    | 0   | 0    | 0   | 0    |
| Nitrobacter                    | 5  | 0.01 | 36 | 0.1  | 4  | 0.01 | 8   | 0.02 | 1   | 0    |
| Stanieria                      | 1  | 0    | 1  | 0    | 0  | 0    | 3   | 0.01 | 1   | 0    |
| Devosia                        | 20 | 0.05 | 47 | 0.13 | 2  | 0.01 | 8   | 0.02 | 2   | 0.01 |
| Nitrosospira                   | 0  | 0    | 1  | 0    | 0  | 0    | 0   | 0    | 0   | 0    |
| Idiomarina                     | 11 | 0.03 | 6  | 0.02 | 0  | 0    | 14  | 0.04 | 3   | 0.01 |
| unclassified_Veillonellaceae   | 1  | 0    | 7  | 0.02 | 0  | 0    | 0   | 0    | 0   | 0    |
| Niastella                      | 4  | 0.01 | 7  | 0.02 | 0  | 0    | 7   | 0.02 | 2   | 0.01 |
| Dehalococcoides                | 0  | 0    | 1  | 0    | 0  | 0    | 0   | 0    | 0   | 0    |
| Sediminibacterium              | 1  | 0    | 8  | 0.02 | 1  | 0    | 4   | 0.01 | 4   | 0.01 |
| Thermincola                    | 1  | 0    | 1  | 0    | 0  | 0    | 1   | 0    | 0   | 0    |
| Cohnella                       | 3  | 0.01 | 1  | 0    | 2  | 0.01 | 0   | 0    | 6   | 0.02 |
| Stella                         | 5  | 0.01 | 5  | 0.01 | 1  | 0    | 4   | 0.01 | 0   | 0    |
| Lactobacillus                  | 0  | 0    | 1  | 0    | 0  | 0    | 0   | 0    | 3   | 0.01 |
| Geopsychrobacter               | 1  | 0    | 0  | 0    | 0  | 0    | 0   | 0    | 0   | 0    |
| Alicyclobacillus               | 0  | 0    | 1  | 0    | 0  | 0    | 1   | 0    | 0   | 0    |
| Desulfovibrio                  | 18 | 0.05 | 17 | 0.05 | 38 | 0.1  | 172 | 0.47 | 123 | 0.33 |
| possible_genus_04              | 3  | 0.01 | 0  | 0    | 0  | 0    | 0   | 0    | 1   | 0    |
| Ancylobacter                   | 0  | 0    | 0  | 0    | 1  | 0    | 0   | 0    | 0   | 0    |
| Alkanindiges                   | 1  | 0    | 0  | 0    | 4  | 0.01 | 13  | 0.04 | 0   | 0    |
