# Supplementary material
Source: PubMed Central journal article supplement (PMC6954164)
Supplement: 13205_2019_2027_MOESM3_ESM.pdf [file 13205_2019_2027_MOESM3_ESM.pdf]

**Supplementary Table S3: All samples Fungal genus abundance**

| Genus                          | S1_reads | S1_ratio | S2_reads | S2_ratio | S3_reads | S3_ratio | S4_reads | S4_ratio | S5_reads | S5_ratio |
|--------------------------------|----------|----------|----------|----------|----------|----------|----------|----------|----------|----------|
| Knufia                         | 9        | 0.06     | 0        | 0        | 0        | 0        | 0        | 0        | 11       | 0.07     |
| Acremonium                     | 41       | 0.26     | 74       | 0.47     | 1        | 0.01     | 47       | 0.3      | 3        | 0.02     |
| Cephalotrichum                 | 0        | 0        | 0        | 0        | 0        | 0        | 1        | 0.01     | 0        | 0        |
| unclassified_Sebacinaceae      | 0        | 0        | 0        | 0        | 8        | 0.05     | 0        | 0        | 0        | 0        |
| Vanderwaltozyma                | 46       | 0.3      | 125      | 0.8      | 1        | 0.01     | 43       | 0.28     | 0        | 0        |
| Cyberindnra                    | 0        | 0        | 0        | 0        | 8        | 0.05     | 0        | 0        | 0        | 0        |
| Lecythophora                   | 0        | 0        | 0        | 0        | 0        | 0        | 3        | 0.02     | 0        | 0        |
| Eucasphaeria                   | 3        | 0.02     | 18       | 0.12     | 0        | 0        | 8        | 0.05     | 1        | 0.01     |
| Arthrinium                     | 0        | 0        | 0        | 0        | 0        | 0        | 0        | 0        | 0        | 0        |
| Engyodontium                   | 0        | 0        | 13       | 0.08     | 1        | 0.01     | 0        | 0        | 24       | 0.15     |
| unclassified_Pleosporales      | 0        | 0        | 0        | 0        | 8        | 0.05     | 5        | 0.03     | 0        | 0        |
| Inonotus                       | 5        | 0.03     | 0        | 0        | 6        | 0.04     | 0        | 0        | 62       | 0.4      |
| unclassified_Eurotiomycetes    | 0        | 0        | 1        | 0.01     | 0        | 0        | 0        | 0        | 0        | 0        |
| Flammulina                     | 0        | 0        | 0        | 0        | 4        | 0.03     | 0        | 0        | 0        | 0        |
| Leptospora                     | 3        | 0.02     | 0        | 0        | 0        | 0        | 0        | 0        | 0        | 0        |
| Ilyonectria                    | 0        | 0        | 1        | 0.01     | 0        | 0        | 0        | 0        | 0        | 0        |
| unclassified_Chytridiomycota   | 45       | 0.29     | 50       | 0.32     | 3        | 0.02     | 4        | 0.03     | 19       | 0.12     |
| Clavulina                      | 0        | 0        | 0        | 0        | 6        | 0.04     | 0        | 0        | 0        | 0        |
| Laccaria                       | 0        | 0        | 0        | 0        | 3        | 0.02     | 0        | 0        | 0        | 0        |
| Tylospora                      | 0        | 0        | 0        | 0        | 1        | 0.01     | 0        | 0        | 0        | 0        |
| unclassified_Tricholomataceae  | 0        | 0        | 27       | 0.17     | 3        | 0.02     | 0        | 0        | 0        | 0        |
| Ochroconis                     | 0        | 0        | 0        | 0        | 2        | 0.01     | 0        | 0        | 0        | 0        |
| Entoloma                       | 3        | 0.02     | 0        | 0        | 0        | 0        | 0        | 0        | 0        | 0        |
| unclassified_Mortierellales    | 1        | 0.01     | 5        | 0.03     | 1        | 0.01     | 4        | 0.03     | 0        | 0        |
| unclassified_Auriculariales    | 0        | 0        | 0        | 0        | 0        | 0        | 6        | 0.04     | 0        | 0        |
| unclassified_Corticiales       | 9        | 0.06     | 0        | 0        | 0        | 0        | 8        | 0.05     | 7        | 0.04     |
| unclassified_Sordariales       | 0        | 0        | 20       | 0.13     | 4        | 0.03     | 27       | 0.17     | 70       | 0.45     |
| unclassified_Eurotiales        | 2        | 0.01     | 9        | 0.06     | 2        | 0.01     | 0        | 0        | 24       | 0.15     |
| Massarina                      | 0        | 0        | 0        | 0        | 1        | 0.01     | 0        | 0        | 0        | 0        |
| Hamigera                       | 1        | 0.01     | 0        | 0        | 2        | 0.01     | 0        | 0        | 0        | 0        |
| Tetracladium                   | 1        | 0.01     | 0        | 0        | 0        | 0        | 1        | 0.01     | 0        | 0        |
| Xeromyces                      | 0        | 0        | 0        | 0        | 0        | 0        | 8        | 0.05     | 0        | 0        |
| Phoma                          | 0        | 0        | 37       | 0.24     | 0        | 0        | 0        | 0        | 0        | 0        |
| Kazachstania                   | 3        | 0.02     | 0        | 0        | 7        | 0.04     | 28       | 0.18     | 18       | 0.12     |
| Trichoderma                    | 73       | 0.47     | 0        | 0        | 46       | 0.3      | 2        | 0.01     | 43       | 0.28     |
| Chrysosporium                  | 6        | 0.04     | 9        | 0.06     | 10       | 0.06     | 43       | 0.28     | 25       | 0.16     |
| Amaurascopsis                  | 0        | 0        | 8        | 0.05     | 1        | 0.01     | 0        | 0        | 2        | 0.01     |
| unclassified_Clavariaceae      | 1        | 0.01     | 0        | 0        | 0        | 0        | 0        | 0        | 0        | 0        |
| Pleurotheciella                | 0        | 0        | 9        | 0.06     | 1        | 0.01     | 0        | 0        | 0        | 0        |
| unclassified_Botryosphaeriales | 11       | 0.07     | 9        | 0.06     | 10       | 0.06     | 30       | 0.19     | 23       | 0.15     |
| Grammothele                    | 0        | 0        | 0        | 0        | 0        | 0        | 0        | 0        | 4        | 0.03     |
| unclassified_Pleosporaceae     | 1        | 0.01     | 0        | 0        | 0        | 0        | 0        | 0        | 0        | 0        |
| unclassified_Trechisporales    | 0        | 0        | 413      | 2.65     | 0        | 0        | 0        | 0        | 0        | 0        |
| Villosiclava                   | 4        | 0.03     | 0        | 0        | 3        | 0.02     | 10       | 0.06     | 0        | 0        |
| unclassified_Mucorales         | 0        | 0        | 0        | 0        | 0        | 0        | 3        | 0.02     | 0        | 0        |
| unclassified_Pyronemataceae    | 10       | 0.06     | 0        | 0        | 0        | 0        | 6        | 0.04     | 8        | 0.05     |
| unclassified_Sporidiobolales   | 2        | 0.01     | 1        | 0.01     | 0        | 0        | 0        | 0        | 0        | 0        |
| Rhizophlyctis                  | 0        | 0        | 0        | 0        | 0        | 0        | 0        | 0        | 9        | 0.06     |
| Calvatia                       | 13       | 0.08     | 23       | 0.15     | 6        | 0.04     | 7        | 0.04     | 2        | 0.01     |
| Botryotinia                    | 0        | 0        | 13       | 0.08     | 0        | 0        | 0        | 0        | 0        | 0        |
| Tricharina                     | 1        | 0.01     | 1        | 0.01     | 0        | 0        | 0        | 0        | 0        | 0        |
| Tomentella                     | 1        | 0.01     | 23       | 0.15     | 4        | 0.03     | 0        | 0        | 0        | 0        |
| Penicillium                    | 3696     | 23.71    | 3303     | 21.19    | 12217    | 78.38    | 9504     | 60.97    | 7603     | 48.78    |
| unclassified_Ustilentylomata   | 6        | 0.04     | 0        | 0        | 0        | 0        | 0        | 0        | 0        | 0        |
| Hypoxyton                      | 16       | 0.1      | 36       | 0.23     | 13       | 0.08     | 0        | 0        | 0        | 0        |
| unclassified_Pezizales         | 0        | 0        | 0        | 0        | 0        | 0        | 0        | 0        | 1        | 0.01     |
| Sistotremastrum                | 3        | 0.02     | 14       | 0.09     | 0        | 0        | 0        | 0        | 0        | 0        |
| Coprinopsis                    | 0        | 0        | 3        | 0.02     | 4        | 0.03     | 0        | 0        | 0        | 0        |
| Paraphaeosphaeria              | 0        | 0        | 0        | 0        | 0        | 0        | 0        | 0        | 21       | 0.13     |
| unclassified_Pezizaceae        | 1        | 0.01     | 94       | 0.6      | 11       | 0.07     | 9        | 0.06     | 2        | 0.01     |
| Arthrospis                     | 2        | 0.01     | 0        | 0        | 7        | 0.04     | 33       | 0.21     | 0        | 0        |
| Saccharomycopsis               | 1        | 0.01     | 0        | 0        | 4        | 0.03     | 0        | 0        | 0        | 0        |
| Ramicandelaber                 | 1        | 0.01     | 12       | 0.08     | 4        | 0.03     | 50       | 0.32     | 8        | 0.05     |
| Lichtheimia                    | 1        | 0.01     | 0        | 0        | 3        | 0.02     | 0        | 0        | 0        | 0        |
| Rhinocladella                  | 15       | 0.1      | 17       | 0.11     | 0        | 0        | 7        | 0.04     | 30       | 0.19     |
| unclassified_Agaricomycetes    | 7        | 0.04     | 33       | 0.21     | 3        | 0.02     | 0        | 0        | 23       | 0.15     |
| Capronia                       | 3        | 0.02     | 0        | 0        | 0        | 0        | 6        | 0.04     | 0        | 0        |
| Aspergillus                    | 10       | 0.06     | 69       | 0.44     | 25       | 0.16     | 40       | 0.26     | 73       | 0.47     |

|                                |      |       |      |       |      |       |      |       |      |       |
|--------------------------------|------|-------|------|-------|------|-------|------|-------|------|-------|
| unclassified_Pseudeurotiacea   | 1    | 0.01  | 1    | 0.01  | 0    | 0     | 0    | 0     | 0    | 0     |
| Coprinus                       | 1    | 0.01  | 0    | 0     | 0    | 0     | 0    | 0     | 0    | 0     |
| Sclerostagonospora             | 6    | 0.04  | 8    | 0.05  | 3    | 0.02  | 8    | 0.05  | 80   | 0.51  |
| Inocybe                        | 0    | 0     | 0    | 0     | 6    | 0.04  | 0    | 0     | 0    | 0     |
| Pluteus                        | 670  | 4.3   | 0    | 0     | 5    | 0.03  | 5    | 0.03  | 0    | 0     |
| unclassified_Cortinariaceae    | 3    | 0.02  | 0    | 0     | 12   | 0.08  | 0    | 0     | 11   | 0.07  |
| unclassified_Montagnulaceae    | 0    | 0     | 0    | 0     | 0    | 0     | 0    | 0     | 2    | 0.01  |
| Geastrum                       | 6    | 0.04  | 0    | 0     | 2    | 0.01  | 0    | 0     | 0    | 0     |
| unclassified_Thelephoraceae    | 0    | 0     | 5    | 0.03  | 0    | 0     | 0    | 0     | 0    | 0     |
| unclassified_Lasiosphaeriaceae | 0    | 0     | 0    | 0     | 0    | 0     | 0    | 0     | 0    | 0     |
| unclassified_Sordariomycetes   | 67   | 0.43  | 152  | 0.98  | 6    | 0.04  | 7    | 0.04  | 13   | 0.08  |
| Schizothecium                  | 6    | 0.04  | 157  | 1.01  | 0    | 0     | 6    | 0.04  | 0    | 0     |
| unclassified_Ceratobasidiaceae | 57   | 0.37  | 97   | 0.62  | 4    | 0.03  | 29   | 0.19  | 10   | 0.06  |
| unclassified_Psathyrellaceae   | 18   | 0.12  | 0    | 0     | 6    | 0.04  | 9    | 0.06  | 0    | 0     |
| Podospora                      | 489  | 3.14  | 0    | 0     | 5    | 0.03  | 21   | 0.13  | 0    | 0     |
| Candida                        | 10   | 0.06  | 10   | 0.06  | 2    | 0.01  | 0    | 0     | 0    | 0     |
| Exophiala                      | 12   | 0.08  | 13   | 0.08  | 1    | 0.01  | 0    | 0     | 22   | 0.14  |
| Hypocrea                       | 30   | 0.19  | 22   | 0.14  | 0    | 0     | 0    | 0     | 7    | 0.04  |
| Helicosporium                  | 1    | 0.01  | 14   | 0.09  | 0    | 0     | 0    | 0     | 0    | 0     |
| Rhizophydium                   | 31   | 0.2   | 0    | 0     | 0    | 0     | 0    | 0     | 0    | 0     |
| unclassified_Sebacinales       | 40   | 0.26  | 52   | 0.33  | 0    | 0     | 12   | 0.08  | 7    | 0.04  |
| Scedosporium                   | 0    | 0     | 1    | 0.01  | 0    | 0     | 0    | 0     | 0    | 0     |
| Betamyces                      | 0    | 0     | 3    | 0.02  | 2    | 0.01  | 0    | 0     | 0    | 0     |
| unclassified_Bionectriaceae    | 3    | 0.02  | 0    | 0     | 1    | 0.01  | 0    | 0     | 0    | 0     |
| Mucor                          | 0    | 0     | 0    | 0     | 0    | 0     | 1    | 0.01  | 0    | 0     |
| unclassified_Mortierellaceae   | 11   | 0.07  | 43   | 0.28  | 0    | 0     | 7    | 0.04  | 2    | 0.01  |
| Arthrobotrys                   | 21   | 0.13  | 0    | 0     | 0    | 0     | 3    | 0.02  | 0    | 0     |
| Ganoderma                      | 4    | 0.03  | 20   | 0.13  | 2    | 0.01  | 3    | 0.02  | 42   | 0.27  |
| unclassified_Chaetothyriales   | 0    | 0     | 8    | 0.05  | 0    | 0     | 0    | 0     | 0    | 0     |
| Fusarium                       | 0    | 0     | 0    | 0     | 0    | 0     | 0    | 0     | 8    | 0.05  |
| Vascellum                      | 1    | 0.01  | 9    | 0.06  | 0    | 0     | 13   | 0.08  | 0    | 0     |
| Debaryomyces                   | 0    | 0     | 0    | 0     | 4    | 0.03  | 40   | 0.26  | 23   | 0.15  |
| Trametes                       | 0    | 0     | 0    | 0     | 1    | 0.01  | 0    | 0     | 0    | 0     |
| Diaporthe                      | 2    | 0.01  | 0    | 0     | 0    | 0     | 0    | 0     | 0    | 0     |
| Rhodotorula                    | 7    | 0.04  | 0    | 0     | 0    | 0     | 9    | 0.06  | 21   | 0.13  |
| unclassified                   | 4249 | 27.26 | 1718 | 11.02 | 651  | 4.18  | 3588 | 23.02 | 3765 | 24.15 |
| Guehomyces                     | 0    | 0     | 0    | 0     | 0    | 0     | 1    | 0.01  | 0    | 0     |
| Hypomyces                      | 2    | 0.01  | 0    | 0     | 0    | 0     | 0    | 0     | 0    | 0     |
| Rhizopycnis                    | 0    | 0     | 0    | 0     | 0    | 0     | 1    | 0.01  | 0    | 0     |
| Pholiotina                     | 5    | 0.03  | 7    | 0.04  | 2    | 0.01  | 4    | 0.03  | 23   | 0.15  |
| Arachnion                      | 2    | 0.01  | 0    | 0     | 0    | 0     | 0    | 0     | 0    | 0     |
| unclassified_Fungi             | 100  | 0.64  | 3999 | 25.66 | 35   | 0.22  | 70   | 0.45  | 539  | 3.46  |
| Minimedusa                     | 913  | 5.86  | 0    | 0     | 0    | 0     | 0    | 0     | 0    | 0     |
| Pseudallescheria               | 34   | 0.22  | 32   | 0.21  | 10   | 0.06  | 0    | 0     | 177  | 1.14  |
| Cryptococcus                   | 0    | 0     | 20   | 0.13  | 0    | 0     | 14   | 0.09  | 0    | 0     |
| unclassified_Clavicipitaceae   | 46   | 0.3   | 10   | 0.06  | 5    | 0.03  | 0    | 0     | 19   | 0.12  |
| Cylindrocarpon                 | 20   | 0.13  | 19   | 0.12  | 20   | 0.13  | 74   | 0.47  | 0    | 0     |
| Mortierella                    | 4367 | 28.02 | 4232 | 27.15 | 2278 | 14.61 | 1546 | 9.92  | 1671 | 10.72 |
| Aureobasidium                  | 0    | 0     | 0    | 0     | 0    | 0     | 0    | 0     | 0    | 0     |
| unclassified_Trichocomaceae    | 0    | 0     | 0    | 0     | 0    | 0     | 7    | 0.04  | 0    | 0     |
| Scolecobasidium                | 3    | 0.02  | 4    | 0.03  | 2    | 0.01  | 0    | 0     | 16   | 0.1   |
| Paecilomyces                   | 7    | 0.04  | 29   | 0.19  | 2    | 0.01  | 0    | 0     | 0    | 0     |
| Lalaria                        | 0    | 0     | 0    | 0     | 0    | 0     | 6    | 0.04  | 0    | 0     |
| Minutisphaera                  | 3    | 0.02  | 0    | 0     | 0    | 0     | 0    | 0     | 26   | 0.17  |
| Scutellinia                    | 1    | 0.01  | 0    | 0     | 0    | 0     | 3    | 0.02  | 0    | 0     |
| Cordyceps                      | 0    | 0     | 0    | 0     | 0    | 0     | 0    | 0     | 5    | 0.03  |
| Tritirachium                   | 0    | 0     | 2    | 0.01  | 0    | 0     | 0    | 0     | 4    | 0.03  |
| unclassified_Agaricales        | 10   | 0.06  | 0    | 0     | 0    | 0     | 0    | 0     | 17   | 0.11  |
| Ascobolus                      | 0    | 0     | 0    | 0     | 0    | 0     | 0    | 0     | 25   | 0.16  |
| unclassified_Xylariales        | 1    | 0.01  | 0    | 0     | 0    | 0     | 0    | 0     | 0    | 0     |
| Cystofilobasidium              | 0    | 0     | 20   | 0.13  | 0    | 0     | 1    | 0.01  | 1    | 0.01  |
| Didymosphaeria                 | 198  | 1.27  | 185  | 1.19  | 53   | 0.34  | 138  | 0.89  | 910  | 5.84  |
| unclassified_Ascomycota        | 40   | 0.26  | 145  | 0.93  | 21   | 0.13  | 0    | 0     | 7    | 0.04  |
| Sebacina                       | 0    | 0     | 0    | 0     | 0    | 0     | 0    | 0     | 0    | 0     |
| unclassified_Dothideomycete    | 10   | 0.06  | 10   | 0.06  | 4    | 0.03  | 0    | 0     | 4    | 0.03  |
| Volutella                      | 9    | 0.06  | 0    | 0     | 0    | 0     | 13   | 0.08  | 10   | 0.06  |
| Strelitziana                   | 0    | 0     | 0    | 0     | 0    | 0     | 0    | 0     | 1    | 0.01  |
| unclassified_Russulaceae       | 3    | 0.02  | 20   | 0.13  | 0    | 0     | 0    | 0     | 0    | 0     |
| Metarhizium                    | 10   | 0.06  | 50   | 0.32  | 0    | 0     | 4    | 0.03  | 3    | 0.02  |
